# Supplementary material for: Physical behaviors of 12-15 year-old adolescents in 54 low- and middle-income countries: Results from the Global School-based Student Health Survey
Source: PubMed Central journal article supplement (PMC7211419; doi:10.7189/jogh.10.010423), 2020-06
Supplement: jogh-10-010423-s001.pdf [file jogh-10-010423-s001.pdf]

**Table S1.** Combined physical behaviors among young adolescents aged 12-15 years by gender, region, and country groups.

|                                    | <b>Total, % (95% CI)</b>    |                             |                             |                           | <b>Boys, % (95% CI)</b>     |                             |                             |                           | <b>Girls, % (95% CI)</b>    |                             |                             |                          |
|------------------------------------|-----------------------------|-----------------------------|-----------------------------|---------------------------|-----------------------------|-----------------------------|-----------------------------|---------------------------|-----------------------------|-----------------------------|-----------------------------|--------------------------|
|                                    | Low                         | Moderate-lo<br>w            | Moderate-hi<br>gh           | High                      | Low                         | Moderate-lo<br>w            | Moderate-hi<br>gh           | High                      | Low                         | Moderate-lo<br>w            | Moderate-hi<br>gh           | High                     |
| <b>Africa Region</b>               |                             |                             |                             |                           |                             |                             |                             |                           |                             |                             |                             |                          |
| Algeria*                           | 17.5<br>(14.8-20.3)         | 41.5<br>(38.6-44.4)         | 34.5<br>(32.4-36.5)         | 6.5<br>(5.3-7.6)          | 15.6<br>(13.2-17.9)         | 40.1<br>(37.3-42.8)         | 34.9<br>(32.7-37.1)         | 9.4<br>(7.2-11.7)         | 19.5<br>(16.1-22.9)         | 42.6<br>(38.3-46.8)         | 33.9<br>(31.0-36.7)         | 4.1<br>(2.8-5.3)         |
| Benin                              | 5.5<br>(4.1-6.9)            | 28.4<br>(24.1-32.7)         | 43.2<br>(39.6-46.7)         | 22.9<br>(19.2-26.7)       | 4.9<br>(3.7-6.2)            | 27.2<br>(22.8-31.5)         | 44.2<br>(39.9-48.6)         | 23.7<br>(19.0-28.3)       | 7.0<br>(3.8-10.2)           | 30.8<br>(24.4-37.2)         | 41.3<br>(34.9-47.7)         | 20.9<br>(15.5-26.3)      |
| Mauritania*                        | 27.7<br>(23.1-32.3)         | 41.1<br>(37.2-45.0)         | 23.5<br>(19.7-27.3)         | 7.6<br>(5.3-10.0)         | 22.4<br>(17.9-26.8)         | 40.5<br>(36.1-45.0)         | 27.0<br>(21.0-33.0)         | 10.1<br>(6.6-13.6)        | 34.8<br>(27.1-42.5)         | 41.3<br>(36.1-46.4)         | 19.4<br>(14.7-24.1)         | 4.6<br>(2.6-6.5)         |
| Mauritius*                         | 20.1<br>(16.3-24.0)         | 46.7<br>(43.2-50.3)         | 27.4<br>(24.3-30.6)         | 5.7<br>(4.2-7.3)          | 15.0<br>(12.8-17.3)         | 45.6<br>(41.3-50.0)         | 31.7<br>(28.0-35.4)         | 7.7<br>(5.9-9.4)          | 24.8<br>(20.3-29.4)         | 47.8<br>(43.5-52.1)         | 23.5<br>(20.7-26.3)         | 3.9<br>(2.3-5.4)         |
| Mozambique*                        | 25.1<br>(16.9-33.3)         | 52.2<br>(48.0-56.4)         | 20.5<br>(15.3-25.7)         | 2.2<br>(0.5-3.8)          | 17.2<br>(10.8-23.7)         | 53.3<br>(45.6-61.0)         | 25.8<br>(20.4-31.2)         | 3.6<br>(1.5-5.8)          | 34.0<br>(23.8-44.3)         | 49.3<br>(45.4-53.3)         | 15.4<br>(7.2-23.6)          | 1.2<br>(0.0-2.8)         |
| Namibia*                           | 32.9<br>(29.0-36.8)         | 41.8<br>(39.0-44.7)         | 19.4<br>(17.1-21.6)         | 5.9<br>(4.4-7.4)          | 26.3<br>(22.1-30.5)         | 47.2<br>(43.8-50.6)         | 21.1<br>(18.6-23.9)         | 5.2<br>(3.1-7.4)          | 37.9<br>(33.0-42.8)         | 37.6<br>(33.2-42.0)         | 18.2<br>(15.0-21.3)         | 6.3<br>(4.7-7.9)         |
| Seychelles                         | 29.4<br>(26.6-32.2)         | 44.3<br>(41.7-46.8)         | 21.1<br>(18.9-23.3)         | 5.2<br>(4.1-6.3)          | 27.7<br>(23.8-31.5)         | 44.2<br>(40.9-47.6)         | 22.0<br>(18.7-25.3)         | 6.1<br>(4.2-8.0)          | 31.0<br>(27.8-34.1)         | 44.3<br>(41.0-47.5)         | 20.4<br>(18.2-22.7)         | 4.3<br>(3.0-5.7)         |
| United<br>Republic of<br>Tanzania* | 26.5<br>(22.8-30.2)         | 38.4<br>(36.0-40.9)         | 25.4<br>(22.3-28.5)         | 9.7<br>(8.3-11.1)         | 24.0<br>(19.2-28.8)         | 37.3<br>(33.2-41.4)         | 26.8<br>(22.5-31.0)         | 11.9<br>(9.5-14.4)        | 28.8<br>(24.2-33.4)         | 39.4<br>(36.1-42.6)         | 24.1<br>(20.8-27.3)         | 7.8<br>(6.1-9.4)         |
| <b>Pooled<br/>estimates</b>        | <b>23.0<br/>(14.3-31.7)</b> | <b>41.8<br/>(38.0-45.6)</b> | <b>26.9<br/>(21.3-32.5)</b> | <b>7.8<br/>(5.5-10.1)</b> | <b>19.0<br/>(12.4-25.6)</b> | <b>41.7<br/>(37.2-46.2)</b> | <b>29.2<br/>(23.7-34.6)</b> | <b>9.3<br/>(6.4-12.2)</b> | <b>27.0<br/>(19.1-34.8)</b> | <b>41.9<br/>(38.3-45.4)</b> | <b>24.5<br/>(19.7-29.3)</b> | <b>5.7<br/>(3.8-7.7)</b> |
| <b>I<sup>2</sup>(%)</b>            | 98.4                        | 91.2                        | 96.7                        | 94.5                      | 97.6                        | 90.3                        | 94.6                        | 91.5                      | 96.1                        | 83.0                        | 93.4                        | 91.0                     |
| <b>Region of the<br/>Americas</b>  |                             |                             |                             |                           |                             |                             |                             |                           |                             |                             |                             |                          |

|                      |                     |                     |                     |                   |                     |                     |                     |                     |                     |                     |                     |                   |
|----------------------|---------------------|---------------------|---------------------|-------------------|---------------------|---------------------|---------------------|---------------------|---------------------|---------------------|---------------------|-------------------|
| Antigua and Barbuda* | 29.8<br>(25.6-34.0) | 43.0<br>(39.5-46.5) | 21.6<br>(17.8-25.4) | 5.6<br>(3.6-7.6)  | 25.9<br>(21.4-30.4) | 44.4<br>(38.5-50.3) | 23.1<br>(17.8-28.4) | 6.6<br>(4.1-9.2)    | 34.5<br>(28.9-40.1) | 40.9<br>(36.9-44.9) | 19.9<br>(16.6-23.1) | 4.7<br>(2.4-7.0)  |
| Argentina*           | 11.5<br>(10.3-12.7) | 41.9<br>(40.1-43.7) | 36.8<br>(35.0-38.5) | 9.8<br>(8.7-10.9) | 10.0<br>(8.6-11.4)  | 37.4<br>(35.1-39.7) | 40.6<br>(38.5-42.8) | 11.9<br>(10.2-13.6) | 12.9<br>(11.4-14.4) | 45.8<br>(43.9-47.7) | 33.4<br>(31.3-35.6) | 7.9<br>(6.8-9.0)  |
| Barbados*            | 37.5<br>(33.9-41.0) | 43.0<br>(39.8-46.2) | 16.0<br>(13.8-18.2) | 3.6<br>(2.4-4.7)  | 30.1<br>(25.2-35.0) | 45.0<br>(41.0-48.9) | 20.1<br>(16.5-23.6) | 4.8<br>(3.1-6.6)    | 44.7<br>(39.8-49.5) | 40.9<br>(35.9-45.8) | 12.1<br>(9.6-14.5)  | 2.4<br>(1.3-3.5)  |
| Belize*              | 24.9<br>(20.5-29.3) | 37.7<br>(34.6-40.8) | 29.9<br>(24.8-34.9) | 7.5<br>(5.5-9.5)  | 21.0<br>(16.4-25.5) | 37.8<br>(34.4-41.3) | 31.1<br>(25.1-37.1) | 10.1<br>(7.3-12.9)  | 28.5<br>(23.4-33.7) | 37.6<br>(34.1-41.0) | 28.8<br>(23.0-34.6) | 5.1<br>(2.7-7.4)  |
| Bolivia              | 16.5<br>(14.3-18.6) | 41.4<br>(38.6-44.3) | 33.0<br>(29.5-36.5) | 9.1<br>(7.7-10.4) | 17.6<br>(14.6-20.7) | 39.6<br>(35.5-43.8) | 33.6<br>(29.4-37.8) | 9.1<br>(7.4-10.8)   | 15.8<br>(13.1-18.5) | 43.5<br>(39.7-47.2) | 31.6<br>(28.1-35.0) | 9.2<br>(6.8-11.5) |
| Chile                | 15.7<br>(12.9-18.5) | 42.4<br>(38.2-46.6) | 32.5<br>(29.4-35.6) | 9.4<br>(7.6-11.3) | 13.9<br>(10.0-17.7) | 40.9<br>(33.8-48.0) | 33.4<br>(28.7-38.1) | 11.8<br>(8.5-15.1)  | 17.4<br>(13.5-21.4) | 43.4<br>(38.8-48.0) | 31.8<br>(27.5-36.1) | 7.4<br>(5.2-9.6)  |
| Bahamas*             | 35.2<br>(31.4-39.1) | 45.4<br>(42.3-48.5) | 16.5<br>(13.5-19.5) | 2.9<br>(1.9-3.8)  | 30.3<br>(24.5-36.1) | 47.8<br>(42.4-53.3) | 17.4<br>(13.6-21.3) | 4.5<br>(2.5-6.4)    | 39.4<br>(34.6-44.1) | 43.3<br>(38.0-48.6) | 15.7<br>(12.2-19.1) | 1.7<br>(1.1-2.3)  |
| Costa Rica*          | 19.5<br>(16.0-23.0) | 41.5<br>(38.7-44.4) | 29.8<br>(27.2-32.5) | 9.1<br>(7.8-10.5) | 15.7<br>(12.0-19.4) | 39.7<br>(35.7-43.7) | 32.2<br>(29.2-35.2) | 12.4<br>(10.1-14.7) | 23.4<br>(19.1-27.6) | 43.2<br>(39.5-47.0) | 27.5<br>(23.0-32.0) | 5.9<br>(4.7-7.1)  |
| Curaçao*             | 33.8<br>(30.4-37.2) | 44.4<br>(42.0-46.7) | 17.4<br>(13.8-21.0) | 4.4<br>(3.3-5.6)  | 30.6<br>(26.2-34.9) | 42.3<br>(39.1-45.4) | 20.7<br>(16.1-25.4) | 6.4<br>(4.7-8.2)    | 36.7<br>(32.6-40.9) | 46.6<br>(43.2-50.1) | 14.1<br>(11.0-17.3) | 2.5<br>(1.4-3.5)  |
| El Salvador*         | 19.4<br>(15.5-23.3) | 42.0<br>(39.3-44.7) | 31.0<br>(26.8-35.3) | 7.6<br>(5.5-9.7)  | 17.9<br>(12.7-23.0) | 40.0<br>(35.2-44.8) | 32.8<br>(27.0-38.5) | 9.4<br>(6.4-12.3)   | 21.2<br>(16.6-25.7) | 44.2<br>(40.8-47.5) | 28.9<br>(24.2-33.7) | 5.7<br>(4.0-7.5)  |
| Guatemala            | 19.6<br>(16.1-23.0) | 43.7<br>(40.0-47.3) | 31.1<br>(27.5-34.8) | 5.6<br>(3.6-7.7)  | 18.5<br>(15.6-21.4) | 44.1<br>(39.1-49.1) | 32.2<br>(27.7-36.6) | 5.2<br>(2.2-8.2)    | 21.1<br>(16.1-26.1) | 43.8<br>(40.2-47.4) | 29.2<br>(24.3-34.1) | 5.9<br>(4.2-7.6)  |
| Guyana*              | 34.9<br>(29.7-40.1) | 45.8<br>(43.2-48.4) | 16.2<br>(12.1-20.4) | 3.1<br>(2.0-4.2)  | 30.2<br>(25.0-35.4) | 47.6<br>(43.3-51.9) | 17.8<br>(13.5-22.0) | 4.4<br>(3.0-5.9)    | 38.8<br>(32.0-45.7) | 44.7<br>(40.7-48.7) | 14.7<br>(9.3-20.1)  | 1.8<br>(0.9-2.7)  |
| Honduras*            | 16.4<br>(12.9-19.8) | 43.9<br>(39.9-47.8) | 32.2<br>(27.5-36.8) | 7.6<br>(6.0-9.2)  | 13.6<br>(10.5-16.8) | 42.2<br>(36.5-48.0) | 35.0<br>(29.0-41.0) | 9.2<br>(6.5-11.8)   | 18.8<br>(14.2-23.4) | 45.5<br>(40.7-50.4) | 29.5<br>(23.1-35.8) | 6.2<br>(4.4-8.0)  |
| Peru                 | 18.0                | 43.6                | 32.9                | 5.5               | 18.6                | 44.2                | 31.9                | 5.3                 | 17.6                | 43.2                | 33.7                | 5.5               |

|                                     |                    |                    |                    |                  |                    |                    |                    |                  |                   |                    |                    |                  |
|-------------------------------------|--------------------|--------------------|--------------------|------------------|--------------------|--------------------|--------------------|------------------|-------------------|--------------------|--------------------|------------------|
|                                     | (15.0-21.1)        | (41.2-46.1)        | (29.4-36.3)        | (4.3-6.6)        | (15.2-22.0)        | (41.1-47.4)        | (28.2-35.6)        | (3.9-6.7)        | (13.7-21.5)       | (39.8-46.6)        | (29.1-38.3)        | (3.9-7.1)        |
| Suriname                            | 24.0               | 41.6               | 27.5               | 6.9              | 21.3               | 42.7               | 27.5               | 8.6              | 26.2              | 40.5               | 27.7               | 5.6              |
|                                     | (18.3-29.7)        | (38.5-44.8)        | (22.7-32.3)        | (5.1-8.7)        | (16.0-26.5)        | (38.5-46.8)        | (24.3-30.6)        | (5.7-11.5)       | (19.5-32.9)       | (35.4-45.6)        | (21.1-34.4)        | (3.7-7.5)        |
| Trinidad and Tobago*                | 29.6               | 45.7               | 20.3               | 4.4              | 25.4               | 46.5               | 22.0               | 6.1              | 33.9              | 44.8               | 18.6               | 2.8              |
|                                     | (25.9-33.3)        | (42.5-48.8)        | (18.4-22.3)        | (3.3-5.5)        | (20.8-30.0)        | (43.0-50.1)        | (19.1-24.8)        | (4.2-8.0)        | (29.2-38.6)       | (39.0-50.5)        | (16.7-20.5)        | (1.6-3.9)        |
| Uruguay*                            | 11.7               | 40.3               | 37.1               | 10.9             | 8.4                | 34.9               | 41.5               | 15.2             | 14.6              | 44.9               | 33.1               | 7.3              |
|                                     | (9.7-13.7)         | (37.3-43.4)        | (33.9-40.2)        | (9.0-12.8)       | (6.2-10.6)         | (30.6-39.1)        | (37.8-45.2)        | (12.0-18.4)      | (11.7-17.6)       | (42.0-47.8)        | (29.5-36.7)        | (6.2-8.5)        |
| <b>Pooled estimates</b>             | <b>23.3</b>        | <b>42.8</b>        | <b>27.1</b>        | <b>6.6</b>       | <b>20.3</b>        | <b>42.1</b>        | <b>29.0</b>        | <b>8.2</b>       | <b>26.0</b>       | <b>44.5</b>        | <b>25.2</b>        | <b>5.1</b>       |
| <b>I<sup>2</sup>(%)</b>             | <b>(19.1-27.5)</b> | <b>(41.8-43.8)</b> | <b>(23.1-31.2)</b> | <b>(5.3-7.9)</b> | <b>(16.8-23.8)</b> | <b>(40.2-43.9)</b> | <b>(25.0-33.0)</b> | <b>(6.7-9.6)</b> | <b>(2.2-30.9)</b> | <b>(42.4-44.7)</b> | <b>(21.1-29.3)</b> | <b>(3.9-6.3)</b> |
| <b>I<sup>2</sup>(%)</b>             | 97.1               | 47.4               | 96.5               | 93.2             | 94.6               | 71.8               | 94.7               | 88.0             | 96.4              | 38.1               | 95.6               | 93.3             |
| <b>Eastern Mediterranean Region</b> |                    |                    |                    |                  |                    |                    |                    |                  |                   |                    |                    |                  |
| Afghanistan                         | 14.5               | 42.8               | 34.8               | 7.9              | 13.2               | 40.0               | 38.1               | 8.7              | 15.6              | 48.3               | 29.3               | 6.8              |
|                                     | (11.5-17.4)        | (36.2-49.3)        | (26.8-42.9)        | (5.7-10.2)       | (8.7-17.7)         | (31.3-48.8)        | (26.2-49.9)        | (5.0-12.4)       | (11.5-19.7)       | (40.8-55.9)        | (22.6-35.9)        | (4.7-9.0)        |
| Egypt                               | 23.1               | 47.2               | 25.8               | 4.0              | 18.7               | 47.2               | 29.5               | 4.7              | 27.0              | 47.5               | 22.3               | 3.2              |
|                                     | (18.8-27.4)        | (41.6-52.7)        | (19.7-31.9)        | (2.3-5.6)        | (13.7-23.6)        | (40.5-54.0)        | (21.4-37.5)        | (2.8-6.6)        | (20.3-33.8)       | (40.2-54.8)        | (14.6-29.9)        | (1.6-4.8)        |
| Iraq*                               | 26.3               | 39.1               | 26.4               | 8.3              | 19.4               | 37.4               | 31.5               | 11.7             | 34.6              | 41.1               | 20.1               | 4.1              |
|                                     | (22.4-30.1)        | (35.8-42.3)        | (22.7-30.1)        | (6.0-10.5)       | (17.0-21.7)        | (33.2-41.6)        | (27.0-36.1)        | (8.6-14.8)       | (28.4-40.9)       | (37.6-44.7)        | (16.3-23.9)        | (1.7-6.5)        |
| Kuwait*                             | 33.2               | 50.1               | 14.0               | 2.7              | 30.3               | 51.2               | 14.8               | 3.6              | 36.2              | 48.7               | 13.2               | 1.9              |
|                                     | (28.7-37.7)        | (45.8-54.3)        | (10.7-17.3)        | (1.3-4.2)        | (22.9-37.6)        | (43.6-58.9)        | (12.1-17.6)        | (1.5-5.7)        | (34.0-38.4)       | (46.1-51.4)        | (9.6-16.8)         | (1.0-2.7)        |
| Lebanon*                            | 27.8               | 47.1               | 21.9               | 3.2              | 23.0               | 47.3               | 26.1               | 3.7              | 32.0              | 46.9               | 18.1               | 2.9              |
|                                     | (25.3-30.2)        | (44.0-50.2)        | (17.6-26.1)        | (2.2-4.3)        | (20.2-25.7)        | (40.4-54.2)        | (20.2-32.0)        | (2.4-4.9)        | (27.5-36.5)       | (44.5-49.3)        | (14.5-21.8)        | (1.7-4.1)        |
| Morocco*                            | 14.6               | 37.1               | 38.3               | 10.1             | 13.7               | 37.0               | 37.3               | 12.1             | 16.2              | 37.2               | 38.8               | 7.8              |
|                                     | (12.3-16.9)        | (33.8-40.3)        | (33.6-42.9)        | (8.4-11.8)       | (10.9-16.4)        | (34.2-39.9)        | (32.8-41.7)        | (9.5-14.6)       | (12.8-19.5)       | (32.0-42.4)        | (32.4-45.2)        | (6.2-9.4)        |
| Oman*                               | 24.9               | 52.0               | 19.8               | 3.3              | 20.5               | 50.9               | 23.8               | 4.8              | 28.6              | 53.4               | 16.2               | 1.9              |
|                                     | (21.5-28.2)        | (49.4-54.7)        | (16.9-22.7)        | (2.5-4.1)        | (18.0-23.0)        | (48.3-53.5)        | (21.0-26.5)        | (3.7-5.9)        | (24.6-32.7)       | (50.0-56.7)        | (13.3-19.0)        | (1.0-2.7)        |

|                              |                    |                    |                    |                   |                    |                    |                    |                   |                    |                    |                    |                   |
|------------------------------|--------------------|--------------------|--------------------|-------------------|--------------------|--------------------|--------------------|-------------------|--------------------|--------------------|--------------------|-------------------|
| Pakistan*                    | 28.0               | 42.0               | 23.0               | 7.0               | 18.3               | 43.4               | 28.6               | 9.7               | 42.8               | 39.8               | 14.5               | 2.9               |
|                              | (21.2-34.7)        | (38.9-45.1)        | (18.7-27.4)        | (3.2-10.8)        | (14.7-21.9)        | (38.6-48.2)        | (25.0-32.3)        | (4.3-15.0)        | (36.8-48.8)        | (37.1-42.6)        | (9.9-19.1)         | (2.1-3.6)         |
| Qatar                        | 29.9               | 43.9               | 20.9               | 5.3               | 26.3               | 44.7               | 22.6               | 6.5               | 33.1               | 43.2               | 19.5               | 4.2               |
|                              | (26.7-33.1)        | (39.7-48.1)        | (17.6-24.2)        | (3.4-7.2)         | (21.9-30.6)        | (38.1-51.2)        | (17.0-28.1)        | (4.7-8.4)         | (28.5-37.7)        | (38.1-48.2)        | (15.7-23.4)        | (1.2-7.2)         |
| Sudan*                       | 38.8               | 45.7               | 13.7               | 1.8               | 32.5               | 49.0               | 16.1               | 2.4               | 45.9               | 42.0               | 10.9               | 1.2               |
|                              | (32.9-44.8)        | (41.2-50.2)        | (10.0-17.4)        | (0.9-2.7)         | (28.3-36.7)        | (42.6-55.5)        | (11.5-20.7)        | (0.7-4.1)         | (37.9-53.9)        | (36.8-47.1)        | (7.1-14.8)         | (0.5-1.9)         |
| Syrian Arab Republic         | 27.7               | 43.3               | 23.7               | 5.3               | 25.9               | 42.1               | 25.5               | 6.4               | 29.6               | 44.6               | 21.7               | 4.1               |
|                              | (23.6-31.8)        | (39.8-46.9)        | (20.5-26.8)        | (3.9-6.7)         | (22.8-29.1)        | (40.4-43.8)        | (22.6-28.5)        | (5.2-7.7)         | (23.5-35.7)        | (38.6-50.6)        | (18.2-25.3)        | (2.4-5.8)         |
| United Arab Emirates*        | 33.8               | 49.3               | 15.0               | 1.9               | 25.6               | 50.3               | 21.2               | 2.9               | 39.0               | 48.7               | 10.9               | 1.3               |
|                              | (29.3-38.3)        | (45.7-52.9)        | (12.5-17.5)        | (1.0-2.7)         | (22.2-29.0)        | (46.6-53.9)        | (18.4-24.0)        | (1.9-3.9)         | (35.2-42.9)        | (44.9-52.5)        | (9.1-12.7)         | (0.6-2.0)         |
| <b>Pooled estimates</b>      | <b>26.7</b>        | <b>45.0</b>        | <b>22.7</b>        | <b>4.9</b>        | <b>22.1</b>        | <b>44.9</b>        | <b>25.7</b>        | <b>6.0</b>        | <b>31.5</b>        | <b>45.1</b>        | <b>19.1</b>        | <b>3.3</b>        |
| <b>I<sup>2</sup>(%)</b>      | <b>(22.4-31.0)</b> | <b>(42.1-47.9)</b> | <b>(19.0-26.5)</b> | <b>(3.5-6.2)</b>  | <b>(19.1-25.1)</b> | <b>(41.6-48.2)</b> | <b>(21.8-29.5)</b> | <b>(4.5-7.5)</b>  | <b>(26.2-36.9)</b> | <b>(42.3-47.9)</b> | <b>(15.5-22.8)</b> | <b>(2.3-4.3)</b>  |
|                              | 94.2               | 86.4               | 91.8               | 91.7              | 89.3               | 87.0               | 90.7               | 88.2              | 94.5               | 83.5               | 91.3               | 88.3              |
| <b>Southeast Asia Region</b> |                    |                    |                    |                   |                    |                    |                    |                   |                    |                    |                    |                   |
| Bangladesh                   | 10.4               | 21.9               | 34.1               | 33.6              | 10.5               | 19.1               | 36.3               | 34.1              | 10.4               | 26.7               | 30.0               | 32.9              |
|                              | (7.4-13.3)         | (19.0-24.9)        | (30.1-38.1)        | (27.2-40.0)       | (5.5-15.4)         | (15.0-23.3)        | (31.4-41.1)        | (25.4-42.8)       | (7.0-13.8)         | (22.8-30.6)        | (25.8-34.3)        | (25.7-40.1)       |
| Indonesia*                   | 32.3               | 41.6               | 21.4               | 4.7               | 30.5               | 42.0               | 21.8               | 5.7               | 34.1               | 41.3               | 20.8               | 3.8               |
|                              | (28.9-35.7)        | (39.4-43.8)        | (18.0-24.7)        | (3.5-6.0)         | (27.0-33.9)        | (39.5-44.5)        | (18.7-25.0)        | (4.1-7.3)         | (30.4-37.9)        | (38.7-43.8)        | (17.0-24.6)        | (2.6-5.0)         |
| Thailand                     | 32.3               | 47.3               | 16.7               | 3.7               | 31.7               | 46.0               | 17.3               | 5.0               | 33.0               | 48.4               | 16.1               | 2.4               |
|                              | (29.6-35.1)        | (45.3-49.2)        | (14.8-18.6)        | (2.6-4.8)         | (27.7-35.7)        | (43.4-48.6)        | (14.6-19.9)        | (3.1-6.9)         | (28.9-37.1)        | (45.0-51.9)        | (13.5-18.7)        | (1.6-3.3)         |
| Timor-Leste*                 | 30.4               | 51.3               | 14.7               | 3.6               | 27.7               | 51.4               | 15.9               | 5.0               | 33.1               | 49.9               | 14.1               | 2.9               |
|                              | (27.3-33.5)        | (49.4-53.1)        | (12.5-16.8)        | (2.7-4.6)         | (22.8-32.6)        | (48.4-54.5)        | (12.9-18.9)        | (3.4-6.6)         | (29.9-36.3)        | (47.4-52.4)        | (11.7-16.5)        | (1.8-4.0)         |
| <b>Pooled estimates</b>      | <b>26.3</b>        | <b>40.6</b>        | <b>21.5</b>        | <b>8.6</b>        | <b>25.2</b>        | <b>39.7</b>        | <b>22.6</b>        | <b>8.9</b>        | <b>27.6</b>        | <b>41.6</b>        | <b>20.0</b>        | <b>6.7</b>        |
| <b>I<sup>2</sup>(%)</b>      | <b>(15.7-37.0)</b> | <b>(29.9-51.3)</b> | <b>(14.9-28.2)</b> | <b>(4.9-12.3)</b> | <b>(16.3-34.1)</b> | <b>(28.8-50.6)</b> | <b>(15.5-29.6)</b> | <b>(4.8-13.0)</b> | <b>(15.9-39.3)</b> | <b>(32.7-50.6)</b> | <b>(14.0-26.1)</b> | <b>(3.4-10.0)</b> |
|                              | 98.0               | 99.0               | 96.1               | 96.4              | 94.2               | 87.0               | 94.6               | 92.9              | 97.6               | 97.2               | 93.3               | 95.7              |
| <b>Western</b>               |                    |                    |                    |                   |                    |                    |                    |                   |                    |                    |                    |                   |

| <b>Pacific Region</b>             |             |             |             |             |             |             |             |             |             |             |             |             |
|-----------------------------------|-------------|-------------|-------------|-------------|-------------|-------------|-------------|-------------|-------------|-------------|-------------|-------------|
| Brunei                            | 34.4        | 49.4        | 14.4        | 1.8         | 29.4        | 49.2        | 18.6        | 2.8         | 39.0        | 49.5        | 10.7        | 0.8         |
| Darussalam*                       | (31.9-37.0) | (46.7-52.2) | (12.4-16.3) | (1.1-2.4)   | (26.2-32.5) | (45.3-53.2) | (15.8-21.3) | (1.5-4.1)   | (35.2-42.7) | (46.1-53.0) | (8.7-12.7)  | (0.2-1.3)   |
| Cambodia*                         | 19.6        | 43.4        | 31.0        | 6.0         | 19.7        | 40.8        | 31.5        | 7.9         | 19.7        | 45.6        | 30.4        | 4.3         |
|                                   | (16.3-23.0) | (40.8-45.9) | (27.1-34.8) | (4.8-7.3)   | (15.4-23.9) | (36.6-45.1) | (27.3-35.8) | (6.2-9.6)   | (15.9-23.6) | (42.6-48.5) | (25.4-35.4) | (2.3-6.2)   |
| Kiribati                          | 20.5        | 43.1        | 25.4        | 10.9        | 18.4        | 41.6        | 26.8        | 13.2        | 22.5        | 44.1        | 24.3        | 9.0         |
|                                   | (18.3-22.8) | (39.2-47.1) | (22.3-28.6) | (8.4-13.5)  | (15.2-21.5) | (37.4-45.9) | (21.9-31.7) | (9.5-16.9)  | (19.3-25.8) | (38.0-50.2) | (20.8-27.8) | (6.1-12.0)  |
| Lao People's Democratic Republic* | 25.6        | 48.1        | 21.5        | 4.7         | 21.1        | 48.3        | 24.0        | 6.7         | 29.9        | 48.2        | 19.1        | 2.9         |
|                                   | (21.6-29.6) | (45.4-50.8) | (17.4-25.6) | (3.2-6.2)   | (17.7-24.4) | (44.1-52.4) | (20.2-27.8) | (4.3-9.1)   | (24.1-35.6) | (43.9-52.5) | (13.9-24.2) | (1.7-4.1)   |
| Malaysia*                         | 22.2        | 45.6        | 25.3        | 7.0         | 21.0        | 42.1        | 27.7        | 9.3         | 23.3        | 49.1        | 22.9        | 4.7         |
|                                   | (20.5-23.9) | (44.1-47.1) | (23.5-27.1) | (6.0-7.9)   | (18.9-23.1) | (40.3-43.9) | (25.7-29.7) | (8.0-10.6)  | (21.5-25.1) | (47.1-51.1) | (20.6-25.2) | (3.9-5.5)   |
| Mongolia                          | 8.2         | 32.0        | 44.8        | 15.0        | 8.7         | 31.3        | 43.5        | 16.6        | 7.7         | 32.8        | 45.9        | 13.6        |
|                                   | (6.7-9.6)   | (29.2-34.9) | (42.2-47.3) | (13.1-17.0) | (7.0-10.4)  | (28.1-34.5) | (40.2-46.7) | (14.2-18.9) | (5.9-9.5)   | (29.1-36.5) | (42.4-49.4) | (11.2-16.0) |
| Philippines                       | 24.2        | 48.0        | 23.6        | 4.2         | 26.5        | 46.1        | 23.2        | 4.2         | 22.2        | 49.7        | 24.0        | 4.1         |
|                                   | (21.6-26.8) | (45.5-50.5) | (21.1-26.1) | (3.2-5.1)   | (23.8-29.1) | (42.6-49.6) | (20.1-26.3) | (3.2-5.3)   | (18.7-25.7) | (47.3-52.1) | (21.4-26.5) | (2.9-5.3)   |
| Samoa                             | 28.1        | 46.3        | 20.0        | 5.5         | 26.9        | 49.4        | 18.8        | 4.8         | 28.9        | 43.9        | 21.2        | 5.9         |
|                                   | (25.4-30.9) | (43.6-49.1) | (18.0-22.0) | (4.2-6.8)   | (23.6-30.3) | (45.5-53.3) | (15.4-22.3) | (2.5-7.2)   | (25.6-32.3) | (40.0-47.9) | (19.0-23.4) | (3.9-8.0)   |
| Solomon Islands                   | 20.0        | 44.6        | 27.9        | 7.5         | 21.1        | 42.0        | 28.6        | 8.2         | 17.6        | 46.0        | 30.1        | 6.3         |
|                                   | (14.1-26.0) | (38.1-51.2) | (22.0-33.8) | (4.1-10.9)  | (13.8-28.5) | (34.8-49.3) | (22.7-34.6) | (3.4-12.9)  | (11.1-24.0) | (40.4-51.6) | (22.3-37.9) | (4.3-8.4)   |
| Tonga                             | 28.7        | 43.7        | 20.2        | 7.3         | 27.6        | 43.6        | 22.2        | 6.7         | 30.1        | 43.8        | 18.2        | 7.9         |
|                                   | (26.1-31.4) | (41.1-46.3) | (17.8-22.6) | (5.9-8.8)   | (24.1-31.1) | (40.1-47.0) | (18.1-26.3) | (4.8-8.5)   | (26.2-33.9) | (40.1-47.4) | (15.6-20.9) | (6.1-9.8)   |
| Vanuatu                           | 13.4        | 31.6        | 46.4        | 8.6         | 11.4        | 32.5        | 47.3        | 8.8         | 15.5        | 30.9        | 45.5        | 8.1         |
|                                   | (4.6-22.2)  | (23.9-39.3) | (33.5-59.4) | (3.7-13.4)  | (3.2-19.6)  | (24.5-40.6) | (37.1-57.6) | (3.1-14.4)  | (5.8-25.2)  | (21.2-40.6) | (28.0-63.0) | (2.5-13.7)  |
| Vietnam*                          | 6.5         | 33.7        | 49.1        | 10.7        | 6.1         | 32.3        | 49.3        | 12.2        | 6.8         | 34.9        | 48.9        | 9.4         |
|                                   | (4.9-8.1)   | (29.9-37.5) | (44.4-53.8) | (8.9-12.5)  | (4.2-8.0)   | (27.1-37.5) | (44.2-54.5) | (9.3-15.2)  | (4.4-9.3)   | (30.6-39.1) | (43.4-54.5) | (6.9-11.9)  |

|                                |                                   |                                   |                                   |                                |                                   |                                   |                                   |                                 |                                   |                                   |                                   |                                |
|--------------------------------|-----------------------------------|-----------------------------------|-----------------------------------|--------------------------------|-----------------------------------|-----------------------------------|-----------------------------------|---------------------------------|-----------------------------------|-----------------------------------|-----------------------------------|--------------------------------|
| Wallis and Futuna              | 22.3<br>(18.5-26.0)               | 51.7<br>(47.0-56.5)               | 20.6<br>(17.7-23.5)               | 5.4<br>(3.6-7.1)               | 21.1<br>(15.8-26.4)               | 50.8<br>(44.5-57.0)               | 21.6<br>(17.8-25.4)               | 6.6<br>(3.7-9.4)                | 23.8<br>(18.6-29.1)               | 52.1<br>(45.7-58.6)               | 19.8<br>(15.6-24.1)               | 4.2<br>(1.8-6.6)               |
| <b>Pooled estimates</b>        | <b>21.1</b><br><b>(15.8-26.5)</b> | <b>43.4</b><br><b>(40.5-46.4)</b> | <b>27.9</b><br><b>(22.8-33.1)</b> | <b>7.2</b><br><b>(5.3-9.0)</b> | <b>20.0</b><br><b>(15.0-24.9)</b> | <b>42.5</b><br><b>(39.2-45.8)</b> | <b>29.1</b><br><b>(24.2-33.9)</b> | <b>8.2</b><br><b>(6.1-10.3)</b> | <b>22.1</b><br><b>(16.5-27.7)</b> | <b>44.3</b><br><b>(41.0-47.5)</b> | <b>27.0</b><br><b>(21.5-32.6)</b> | <b>6.1</b><br><b>(4.2-7.9)</b> |
| <b>I<sup>2</sup>(%)</b>        | 98.3                              | 92.3                              | 97.7                              | 95.9                           | 97.2                              | 89.1                              | 95.6                              | 93.0                            | 97.4                              | 89.5                              | 97.2                              | 95.1                           |
| <b>Total Pooled estimates*</b> | <b>24.1</b><br><b>(21.6-26.5)</b> | <b>43.0</b><br><b>(42.1-43.9)</b> | <b>25.3</b><br><b>(22.8-27.7)</b> | <b>6.6</b><br><b>(5.4-7.8)</b> | <b>21.1</b><br><b>(19.2-23.0)</b> | <b>42.6</b><br><b>(41.2-43.9)</b> | <b>27.5</b><br><b>(25.4-29.6)</b> | <b>7.8</b><br><b>(6.5-9.0)</b>  | <b>26.9</b><br><b>(22.8-31.1)</b> | <b>44.3</b><br><b>(43.4-45.3)</b> | <b>23.1</b><br><b>(19.9-26.2)</b> | <b>5.1</b><br><b>(3.8-6.4)</b> |
| <b>I<sup>2</sup>(%)</b>        | 0                                 | 0                                 | 22.3                              | 52.0                           | 0                                 | 0                                 | 0.7                               | 43.2                            | 29.7                              | 0                                 | 54.4                              | 67.9                           |

\*There was significantly difference in the prevalence of joint physical behavior between different sex group ( $P < 0.05$ ).

**Table S2.** Combined physical behaviors among young adolescents aged 12-15 years by age, region, and country groups.

|                                 | 12-13 years, % (95% CI)           |                                   |                                   |                                | 14-15 years, % (95% CI)           |                                   |                                   |                                 |
|---------------------------------|-----------------------------------|-----------------------------------|-----------------------------------|--------------------------------|-----------------------------------|-----------------------------------|-----------------------------------|---------------------------------|
|                                 | Low                               | Moderate-lo<br>w                  | Moderate-hi<br>gh                 | High                           | Low                               | Moderate-lo<br>w                  | Moderate-hi<br>gh                 | High                            |
| <b>Africa Region</b>            |                                   |                                   |                                   |                                |                                   |                                   |                                   |                                 |
| Algeria*                        | 17.9<br>(14.2-21.6)               | 43.9<br>(39.4-48.4)               | 31.7<br>(28.5-34.9)               | 6.4<br>(5.1-7.8)               | 17.2<br>(14.4-20.0)               | 39.4<br>(37.1-41.7)               | 36.9<br>(34.9-38.9)               | 6.5<br>(4.9-8.1)                |
| Benin                           | 6.7<br>(2.8-10.5)                 | 26.9<br>(20.8-33.1)               | 45.3<br>(38.6-51.9)               | 21.2<br>(16.9-25.4)            | 5.2<br>(3.5-6.9)                  | 28.8<br>(23.6-33.9)               | 42.6<br>(39.0-46.2)               | 23.4<br>(19.5-27.4)             |
| Mauritania*                     | 25.9<br>(22.9-28.9)               | 44.1<br>(38.7-49.6)               | 23.1<br>(16.2-30.1)               | 6.8<br>(3.2-10.4)              | 28.3<br>(22.9-33.8)               | 40.1<br>(35.5-44.8)               | 23.6<br>(19.5-27.8)               | 7.9<br>(5.4-10.3)               |
| Mauritius*                      | 21.2<br>(16.2-26.2)               | 47.6<br>(42.0-53.2)               | 26.3<br>(24.2-28.5)               | 4.9<br>(2.6-7.3)               | 19.4<br>(14.4-24.4)               | 46.2<br>(41.9-50.5)               | 28.1<br>(23.5-32.8)               | 6.2<br>(4.6-7.9)                |
| Mozambique*                     | 23.1<br>(16.1-30.2)               | 50.2<br>(39.1-61.4)               | 25.7<br>(15.8-35.5)               | 1.0<br>(0.0-2.2)               | 25.9<br>(16.4-35.5)               | 53.0<br>(48.3-57.8)               | 18.3<br>(12.0-24.6)               | 2.7<br>(0.5-4.9)                |
| Namibia*                        | 33.7<br>(27.5-39.9)               | 41.7<br>(37.8-45.6)               | 18.5<br>(13.9-23.1)               | 6.1<br>(4.6-7.7)               | 32.6<br>(28.6-36.6)               | 41.9<br>(38.8-45.0)               | 19.7<br>(17.4-22.1)               | 5.8<br>(4.1-7.4).               |
| Seychelles                      | 28.4<br>(23.9-32.9)               | 47.1<br>(43.3-50.8)               | 19.5<br>(16.4-22.6)               | 5.0<br>(3.4-6.7)               | 30.4<br>(27.1-33.8)               | 41.5<br>(38.6-44.5)               | 22.7<br>(19.6-25.8)               | 5.3<br>(3.8-6.8)                |
| United Republic of<br>Tanzania* | 27.8<br>(23.8-31.9)               | 42.4<br>(39.6-45.1)               | 20.9<br>(18.3-23.6)               | 8.9<br>(7.1-10.7)              | 25.4<br>(20.5-30.2)               | 35.0<br>(32.0-38.0)               | 29.3<br>(25.2-33.4)               | 10.3<br>(8.3-12.4)              |
| <b>Pooled estimates</b>         | <b>23.0</b><br><b>(17.1-28.8)</b> | <b>42.8</b><br><b>(39.0-46.5)</b> | <b>26.1</b><br><b>(21.5-30.7)</b> | <b>7.2</b><br><b>(4.4-9.9)</b> | <b>22.9</b><br><b>(14.2-31.7)</b> | <b>40.7</b><br><b>(36.9-44.6)</b> | <b>27.7</b><br><b>(21.4-34.1)</b> | <b>8.1</b><br><b>(5.6-10.7)</b> |
| <b>I<sup>2</sup>(%)</b>         | 93.1                              | 80.6                              | 91.6                              | 94.7                           | 97.9                              | 89.7                              | 96.6                              | 92.9                            |

| <b>Region of the Americas</b> |     |             |             |             |            |             |             |             |            |
|-------------------------------|-----|-------------|-------------|-------------|------------|-------------|-------------|-------------|------------|
| Antigua                       | and | 29.6        | 43.7        | 21.0        | 5.7        | 29.9        | 42.6        | 22.0        | 5.5        |
| Barbuda *                     |     | (23.6-35.7) | (38.3-49.1) | (17.0-25.0) | (3.5-7.9)  | (25.2-34.7) | (38.3-46.9) | (16.9-27.0) | (3.3-7.8)  |
| Argentina*                    |     | 12.3        | 40.8        | 36.4        | 10.5       | 11.2        | 42.4        | 36.9        | 9.5        |
|                               |     | (10.2-14.4) | (37.7-43.9) | (33.3-39.5) | (8.3-12.6) | (9.9-12.4)  | (40.9-44.0) | (35.4-38.5) | (8.5-10.5) |
| Barbados*                     |     | 35.8        | 42.5        | 17.0        | 4.7        | 38.0        | 43.1        | 15.7        | 3.2        |
|                               |     | (29.0-42.5) | (34.8-50.3) | (11.7-22.3) | (2.5-6.9)  | (34.0-42.0) | (39.6-46.6) | (13.2-18.2) | (1.9-4.4)  |
| Belize *                      |     | 26.3        | 35.8        | 31.0        | 6.9        | 23.6        | 39.5        | 28.8        | 8.1        |
|                               |     | (20.7-32.0) | (32.1-39.5) | (24.5-37.5) | (4.8-9.0)  | (19.4-27.9) | (35.7-43.2) | (24.2-33.5) | (5.3-10.9) |
| Bolivia                       |     | 18.4        | 43.2        | 28.5        | 9.9        | 15.6        | 40.6        | 35.1        | 8.7        |
|                               |     | (15.8-21.0) | (40.0-46.4) | (25.2-31.7) | (7.6-12.3) | (12.8-18.4) | (36.7-44.6) | (30.3-39.9) | (7.1-10.3) |
| Chile                         |     | 16.9        | 39.7        | 34.0        | 9.5        | 14.9        | 44.1        | 31.6        | 9.4        |
|                               |     | (13.1-20.7) | (35.6-43.7) | (30.4-37.5) | (6.9-12.0) | (11.6-18.3) | (37.9-50.4) | (27.3-35.9) | (7.4-11.4) |
| Bahamas*                      |     | 34.9        | 47.1        | 15.0        | 3.0        | 35.6        | 43.5        | 18.2        | 2.7        |
|                               |     | (30.3-39.5) | (43.3-50.9) | (12.1-17.8) | (1.8-4.3)  | (29.4-41.8) | (38.9-48.1) | (12.9-23.5) | (1.5-3.9)  |
| Costa Rica*                   |     | 21.2        | 43.8        | 25.8        | 9.2        | 18.7        | 40.4        | 31.9        | 9.1        |
|                               |     | (16.7-25.8) | (39.7-48.0) | (23.3-28.2) | (6.8-11.5) | (14.9-22.5) | (37.0-43.8) | (29.0-34.8) | (7.0-11.1) |
| Curaçao *                     |     | 33.2        | 47.0        | 16.1        | 3.7        | 34.1        | 43.2        | 17.9        | 4.7        |
|                               |     | (28.2-38.1) | (42.2-51.8) | (11.2-21.0) | (2.0-5.5)  | (30.4-37.8) | (40.9-45.5) | (14.2-21.7) | (3.2-6.2)  |
| El Salvador*                  |     | 21.5        | 36.8        | 36.4        | 5.3        | 18.5        | 44.4        | 28.5        | 8.6        |
|                               |     | (15.3-27.6) | (30.8-42.8) | (30.0-42.8) | (1.7-8.9)  | (14.4-22.5) | (41.5-47.4) | (24.1-32.9) | (6.5-10.8) |
| Guatemala                     |     | 22.4        | 45.5        | 28.1        | 4.1        | 18.0        | 42.6        | 32.8        | 6.5        |
|                               |     | (15.4-29.3) | (39.3-51.7) | (24.3-31.9) | (2.2-6.0)  | (14.1-22.0) | (37.5-47.8) | (28.2-37.5) | (4.1-8.9)  |
| Guyana*                       |     | 30.1        | 50.8        | 16.2        | 2.9        | 36.8        | 43.7        | 16.3        | 3.2        |
|                               |     | (23.4-36.8) | (47.8-53.9) | (11.3-21.1) | (1.5-4.3)  | (31.9-41.8) | (41.0-46.4) | (11.7-20.8) | (1.9-4.4)  |
| Honduras*                     |     | 17.0        | 44.0        | 30.5        | 8.5        | 15.7        | 43.8        | 33.7        | 6.8        |



|                                             |                    |                    |                    |                  |                    |                    |                    |                  |
|---------------------------------------------|--------------------|--------------------|--------------------|------------------|--------------------|--------------------|--------------------|------------------|
|                                             | (11.2-22.8)        | (37.5-50.4)        | (23.6-37.4)        | (5.5-11.5)       | (12.0-19.5)        | (40.6-47.0)        | (29.0-38.3)        | (4.9-8.7)        |
| Peru                                        | 18.6               | 44.4               | 30.7               | 6.3              | 17.9               | 43.4               | 33.6               | 5.2              |
|                                             | (14.1-23.1)        | (38.6-50.3)        | (23.3-38.1)        | (4.4-8.1)        | (14.5-21.2)        | (41.1-45.6)        | (30.3-36.9)        | (3.9-6.4)        |
| Suriname                                    | 26.3               | 41.0               | 24.0               | 8.7              | 22.9               | 41.9               | 29.2               | 6.0              |
|                                             | (19.9-32.7)        | (35.2-46.8)        | (19.8-28.1)        | (5.2-12.2)       | (16.4-29.3)        | (38.3-45.5)        | (22.6-35.8)        | (4.3-7.7)        |
| Trinidad and<br>Tobago*                     | 29.3               | 47.2               | 19.2               | 4.2              | 29.9               | 44.3               | 21.2               | 4.6              |
|                                             | (24.6-33.9)        | (43.9-50.6)        | (16.8-21.7)        | (2.4-6.0)        | (26.5-33.2)        | (40.3-48.4)        | (18.4-24.0)        | (3.0-6.2)        |
| Uruguay*                                    | 9.6                | 38.5               | 40.0               | 12.0             | 12.5               | 41.1               | 36.0               | 10.4             |
|                                             | (7.0-12.3)         | (34.0-42.9)        | (35.2-44.8)        | (9.5-14.4)       | (10.3-14.8)        | (37.8-44.3)        | (33.1-38.8)        | (8.2-12.7)       |
| <b>Pooled estimates</b>                     | <b>23.5</b>        | <b>43.1</b>        | <b>26.3</b>        | <b>6.7</b>       | <b>23.0</b>        | <b>42.7</b>        | <b>27.6</b>        | <b>6.5</b>       |
|                                             | <b>(19.5-27.6)</b> | <b>(41.0-45.3)</b> | <b>(22.6-30.1)</b> | <b>(5.2-8.1)</b> | <b>(18.7-27.3)</b> | <b>(41.9-43.4)</b> | <b>(23.6-31.7)</b> | <b>(5.2-7.8)</b> |
| <b>I<sup>2</sup>(%)</b>                     | 93.5               | 75.8               | 93.6               | 87.3             | 96.7               | 0.0                | 95.7               | 90.9             |
| <b>Eastern<br/>Mediterranean<br/>Region</b> |                    |                    |                    |                  |                    |                    |                    |                  |
| Afghanistan                                 | 18.1               | 44.6               | 28.4               | 8.8              | 13.0               | 42.1               | 37.3               | 7.6              |
|                                             | (13.1-23.1)        | (34.7-54.6)        | (20.1-36.7)        | (4.1-13.6)       | (9.8-16.3)         | (35.9-48.2)        | (28.6-46.0)        | (5.1-10.1)       |
| Egypt                                       | 20.8               | 49.5               | 25.6               | 4.1              | 25.6               | 44.5               | 26.0               | 3.8              |
|                                             | (14.4-27.2)        | (42.5-56.4)        | (18.4-32.7)        | (1.7-6.5)        | (19.3-31.9)        | (37.7-51.3)        | (17.7-34.4)        | (2.2-5.4)        |
| Iraq*                                       | 23.4               | 42.2               | 26.5               | 7.9              | 28.0               | 37.2               | 26.4               | 8.5              |
|                                             | (18.9-27.8)        | (37.5-46.9)        | (21.9-31.1)        | (4.8-11.0)       | (23.1-32.8)        | (33.8-40.6)        | (22.1-30.6)        | (6.1-10.9)       |
| Kuwait*                                     | 30.1               | 52.2               | 13.8               | 3.9              | 34.5               | 49.1               | 14.1               | 2.2              |
|                                             | (24.4-35.8)        | (45.6-58.8)        | (9.2-18.4)         | (2.6-5.2)        | (28.9-40.2)        | (44.8-53.4)        | (10.8-17.4)        | (0.9-3.5)        |
| Lebanon*                                    | 27.9               | 48.6               | 20.3               | 3.2              | 27.7               | 46.0               | 23.0               | 3.3              |
|                                             | (25.1-30.8)        | (45.9-51.4)        | (16.7-23.8)        | (2.0-4.3)        | (23.7-31.6)        | (41.6-50.5)        | (16.7-29.2)        | (1.8-4.9)        |
| Morocco*                                    | 15.8               | 34.7               | 40.3               | 9.1              | 13.6               | 38.9               | 36.7               | 10.8             |
|                                             | (12.6-19.0)        | (30.8-38.7)        | (34.5-46.1)        | (6.6-11.6)       | (10.9-16.4)        | (35.2-42.6)        | (31.3-42.0)        | (8.6-13.1)       |

|                                  |                    |                    |                    |                   |                    |                    |                    |                   |
|----------------------------------|--------------------|--------------------|--------------------|-------------------|--------------------|--------------------|--------------------|-------------------|
| Oman*                            | 24.6               | 50.9               | 21.2               | 3.3               | 25.0               | 52.4               | 19.4               | 3.3               |
|                                  | (20.3-28.8)        | (46.1-55.7)        | (17.3-25.1)        | (1.9-4.7)         | (21.1-28.9)        | (49.7-55.0)        | (15.9-22.8)        | (2.3-4.2)         |
| Pakistan*                        | 32.5               | 43.7               | 17.5               | 6.4               | 26.6               | 41.5               | 24.8               | 7.2               |
|                                  | (24.1-40.9)        | (38.6-48.7)        | (12.3-22.6)        | (2.6-10.1)        | (20.0-33.1)        | (38.1-44.8)        | (20.5-29.0)        | (3.3-11.2)        |
| Qatar                            | 29.5               | 43.3               | 20.4               | 6.7               | 30.3               | 44.6               | 21.4               | 3.7               |
|                                  | (25.0-34.1)        | (38.7-48.0)        | (17.5-23.3)        | (3.5-9.8)         | (25.8-34.8)        | (38.2-51.0)        | (16.3-26.5)        | (2.1-5.3)         |
| Sudan*                           | 39.2               | 46.2               | 12.4               | 2.1               | 38.7               | 45.5               | 14.1               | 1.7               |
|                                  | (31.7-46.7)        | (39.7-52.7)        | (7.9-17.0)         | (0.3-4.0)         | (32.0-45.4)        | (40.4-50.6)        | (9.2-19.0)         | (0.8-2.6)         |
| Syrian Arab<br>Republic          | 29.1               | 44.8               | 21.9               | 4.3               | 26.5               | 42.1               | 25.3               | 6.2               |
|                                  | (23.9-34.3)        | (39.6-50.0)        | (18.9-24.8)        | (3.3-5.3)         | (22.4-30.7)        | (38.8-45.3)        | (21.1-29.4)        | (4.0-8.3)         |
| United Arab<br>Emirates*         | 28.9               | 52.5               | 17.3               | 1.3               | 36.1               | 47.8               | 13.9               | 2.1               |
|                                  | (25.3-32.4)        | (48.8-56.3)        | (14.7-20.0)        | (0.5-2.0)         | (30.5-41.7)        | (43.6-52.1)        | (10.8-17.0)        | (1.1-3.2)         |
| <b>Pooled estimates</b>          | <b>26.3</b>        | <b>46.0</b>        | <b>21.7</b>        | <b>4.6</b>        | <b>26.9</b>        | <b>44.3</b>        | <b>23.1</b>        | <b>4.8</b>        |
|                                  | <b>(22.8-29.8)</b> | <b>(42.8-49.3)</b> | <b>(18.4-25.0)</b> | <b>(3.3-5.9)</b>  | <b>(22.0-31.9)</b> | <b>(41.2-47.4)</b> | <b>(19.0-27.2)</b> | <b>(3.4-6.1)</b>  |
| <b>I<sup>2</sup>(%)</b>          | 85.5               | 81.6               | 87.1               | 85.4              | 93.3               | 85.1               | 89.7               | 89.3              |
| <b>Southeast Asia<br/>Region</b> |                    |                    |                    |                   |                    |                    |                    |                   |
| Bangladesh                       | 18.5               | 26.2               | 29.9               | 25.4              | 6.8                | 20.1               | 35.9               | 37.2              |
|                                  | (13.3-23.7)        | (20.0-32.4)        | (25.9-34.0)        | (18.8-32.0)       | (4.5-9.2)          | (17.5-22.7)        | (30.6-41.2)        | (29.6-44.8)       |
| Indonesia*                       | 33.3               | 40.7               | 20.9               | 5.1               | 31.2               | 42.5               | 21.9               | 4.4               |
|                                  | (29.6-37.0)        | (38.3-43.1)        | (17.5-24.2)        | (3.7-6.5)         | (28.2-34.3)        | (39.9-45.2)        | (18.8-25.0)        | (2.9-5.9)         |
| Thailand                         | 32.2               | 46.6               | 16.9               | 4.2               | 32.4               | 47.8               | 16.5               | 3.3               |
|                                  | (28.7-35.8)        | (43.1-50.2)        | (14.4-19.5)        | (2.9-5.6)         | (28.9-35.8)        | (44.7-50.9)        | (14.2-18.8)        | (1.9-4.7)         |
| Timor-Leste*                     | 30.2               | 53.5               | 12.4               | 4.0               | 30.5               | 50.4               | 15.6               | 3.5               |
|                                  | (25.4-35.0)        | (48.7-58.2)        | (9.0-15.8)         | (2.1-5.8)         | (27.2-33.8)        | (48.0-52.7)        | (13.6-17.6)        | (2.6-4.5)         |
| <b>Pooled estimates</b>          | <b>28.8</b>        | <b>42.0</b>        | <b>19.9</b>        | <b>7.5</b>        | <b>25.2</b>        | <b>40.2</b>        | <b>22.0</b>        | <b>8.6</b>        |
|                                  | <b>(22.9-34.7)</b> | <b>(33.7-50.2)</b> | <b>(13.5-26.4)</b> | <b>(4.0-10.9)</b> | <b>(11.4-39.0)</b> | <b>(26.3-54.1)</b> | <b>(15.9-28.1)</b> | <b>(4.5-12.7)</b> |

| <b>F<sup>2</sup>(%)</b>           | 87.1                | 94.5                | 93.5                | 92.3                | 98.8                | 99.1                | 94.7                | 96.0                |
|-----------------------------------|---------------------|---------------------|---------------------|---------------------|---------------------|---------------------|---------------------|---------------------|
| <b>Western Pacific Region</b>     |                     |                     |                     |                     |                     |                     |                     |                     |
| Brunei Darussalam*                | 30.4<br>(26.9-34.0) | 54.5<br>(50.6-58.4) | 12.1<br>(9.6-14.7)  | 3.0<br>(1.5-4.4)    | 36.3<br>(33.3-39.2) | 47.1<br>(44.0-50.3) | 15.4<br>(13.0-17.8) | 1.2<br>(0.6-1.8)    |
| Cambodia*                         | 20.9<br>(17.0-24.8) | 44.4<br>(40.7-48.2) | 28.3<br>(21.7-34.9) | 6.3<br>(3.6-9.1)    | 19.1<br>(15.5-22.8) | 42.9<br>(39.9-46.0) | 32.0<br>(28.5-35.5) | 5.9<br>(4.5-7.3)    |
| Kiribati                          | 23.1<br>(19.1-27.0) | 43.1<br>(37.1-49.1) | 24.6<br>(20.4-28.8) | 9.2<br>(5.8-12.6)   | 19.4<br>(17.1-21.8) | 43.1<br>(38.7-47.5) | 25.7<br>(22.2-29.2) | 11.7<br>(8.7-14.7)  |
| Lao People's Democratic Republic* | 20.1<br>(13.6-26.5) | 46.7<br>(39.5-53.8) | 28.8<br>(22.3-35.3) | 4.4<br>(0.9-8.0)    | 26.4<br>(21.6-31.2) | 48.3<br>(45.2-51.4) | 20.5<br>(16.1-24.9) | 4.8<br>(3.2-6.3)    |
| Malaysia*                         | 20.8<br>(18.9-22.7) | 46.5<br>(44.7-48.3) | 25.5<br>(23.4-27.7) | 7.2<br>(5.8-8.6)    | 22.9<br>(20.8-25.0) | 45.2<br>(43.3-47.0) | 25.1<br>(23.0-27.2) | 6.8<br>(5.8-7.8)    |
| Mongolia                          | 7.3<br>(5.6-9.1)    | 31.2<br>(27.5-35.0) | 44.9<br>(41.3-48.4) | 16.6<br>(13.9-19.2) | 8.8<br>(7.1-10.5)   | 32.7<br>(29.4-36.0) | 44.7<br>(42.1-47.2) | 13.8<br>(11.2-16.4) |
| Philippines                       | 24.5<br>(21.1-28.0) | 47.9<br>(45.4-50.5) | 23.9<br>(20.3-27.6) | 3.6<br>(2.6-4.6)    | 24.0<br>(21.3-26.8) | 48.0<br>(44.6-51.5) | 23.4<br>(20.7-26.1) | 4.5<br>(3.1-5.8)    |
| Samoa                             | 29.4<br>(24.9-33.9) | 47.2<br>(41.0-53.3) | 17.7<br>(14.2-21.3) | 5.7<br>(2.8-8.6)    | 27.7<br>(24.0-31.4) | 46.1<br>(42.6-49.6) | 20.8<br>(18.6-23.0) | 5.4<br>(3.4-7.4)    |
| Solomon Islands                   | 24.2<br>(14.3-34.2) | 43.0<br>(33.2-52.7) | 25.5<br>(20.1-30.9) | 7.3<br>(2.1-12.6)   | 18.2<br>(13.7-22.8) | 45.3<br>(38.2-52.5) | 28.9<br>(21.4-36.4) | 7.5<br>(4.7-10.4)   |
| Tonga                             | 27.1<br>(22.8-31.4) | 43.7<br>(38.4-49.0) | 22.2<br>(15.9-28.5) | 7.0<br>(4.5-9.5)    | 29.4<br>(26.4-32.4) | 43.7<br>(40.9-46.6) | 19.4<br>(16.9-21.8) | 7.5<br>(5.9-9.0)    |
| Vanuatu                           | 15.5<br>(2.4-28.7)  | 35.5<br>(26.9-44.2) | 42.2<br>(25.4-59.1) | 6.7<br>(1.3-12.1)   | 11.1<br>(4.6-17.7)  | 27.3<br>(18.6-36.0) | 51.0<br>(38.1-63.9) | 10.6<br>(5.5-15.7)  |
| Vietnam*                          | 9.2                 | 47.2                | 30.6                | 12.9                | 6.5                 | 33.5                | 49.4                | 10.7                |

|                          |                    |                    |                    |                  |                    |                    |                    |                  |
|--------------------------|--------------------|--------------------|--------------------|------------------|--------------------|--------------------|--------------------|------------------|
|                          |                    |                    |                    |                  | (4.8-8.1)          | (30.1-36.9)        | (44.7-54.0)        | (9.0-12.4)       |
| Wallis and Futuna        | 25.2               | 48.1               | 20.9               | 5.8              | 20.3               | 54.1               | 20.4               | 5.1              |
|                          | (18.5-32.0)        | (40.8-55.4)        | (16.7-25.1)        | (3.0-8.6)        | (16.3-24.3)        | (48.6-59.7)        | (16.5-24.3)        | (3.1-7.1)        |
| <b>Pooled estimates</b>  | <b>22.5</b>        | <b>44.5</b>        | <b>25.7</b>        | <b>6.8</b>       | <b>20.8</b>        | <b>43.2</b>        | <b>28.4</b>        | <b>7.2</b>       |
|                          | <b>(17.2-27.7)</b> | <b>(41.0-48.0)</b> | <b>(20.3-31.2)</b> | <b>(4.8-8.9)</b> | <b>(15.4-26.2)</b> | <b>(40.0-46.3)</b> | <b>(23.0-33.9)</b> | <b>(5.1-9.2)</b> |
| I <sup>2</sup> (%)       | 95.9               | 87.6               | 95.4               | 89.6             | 98.0               | 90.6               | 97.5               | 95.8             |
| <b>Total</b>             |                    |                    |                    |                  |                    |                    |                    |                  |
| <b>Pooled estimates*</b> | <b>24.9</b>        | <b>43.8</b>        | <b>24.1</b>        | <b>6.2</b>       | <b>23.6</b>        | <b>42.7</b>        | <b>25.7</b>        | <b>6.6</b>       |
|                          | <b>(22.8-26.9)</b> | <b>(42.4-45.3)</b> | <b>(21.6-26.6)</b> | <b>(5.0-7.4)</b> | <b>(21.0-26.2)</b> | <b>(42.0-43.4)</b> | <b>(23.2-28.3)</b> | <b>(5.3-7.9)</b> |
| I <sup>2</sup> (%)       | 0                  | 0                  | 33.7               | 45.9             | 0                  | 0                  | 22.0               | 53.9             |

\*There was significantly difference in the prevalence of joint physical behavior between different age group ( $P < 0.05$ ).

**Table S3.** Combined physical behaviors among young adolescents aged 12-15 years by BMI, region, and country group.

|                                 | Normal weight, % (95% CI) |                    |                    |                   | Overweight, % (95% CI) |                    |                    |                  | Obesity, % (95% CI) |                    |                    |                   |
|---------------------------------|---------------------------|--------------------|--------------------|-------------------|------------------------|--------------------|--------------------|------------------|---------------------|--------------------|--------------------|-------------------|
|                                 | Low                       | Moderate-lo        | Moderate-hi        | High              | Low                    | Moderate-lo        | Moderate-hi        | High             | Low                 | Moderate-lo        | Moderate-hi        | High              |
|                                 |                           | w                  | gh                 |                   |                        | w                  | gh                 |                  |                     | w                  | gh                 |                   |
| <b>Africa Region</b>            |                           |                    |                    |                   |                        |                    |                    |                  |                     |                    |                    |                   |
| Algeria*                        | 16.6                      | 42.8               | 34.3               | 6.3               | 18.3                   | 39.5               | 35.6               | 6.6              | 25.4                | 31.1               | 38.6               | 4.8               |
|                                 | (13.8-19.4)               | (40.2-45.5)        | (31.8-36.7)        | (5.1-7.5)         | (11.1-25.5)            | (31.1-47.9)        | (28.7-42.5)        | (3.7-9.6)        | (17.4-33.4)         | (25.5-36.7)        | (30.5-46.8)        | (1.4-8.3)         |
| Benin                           | 5.2                       | 28.2               | 42.3               | 24.3              | 4.5                    | 34.3               | 39.7               | 21.5             | 6.0                 | 20.9               | 55.5               | 17.6              |
|                                 | (3.2-7.2)                 | (24.0-32.4)        | (38.7-45.9)        | (20.4-28.1)       | (0.0-9.0)              | (21.9-46.7)        | (32.7-46.7)        | (12.3-30.7)      | (2.8-9.3)           | (11.3-30.4)        | (45.9-65.0)        | (13.6-21.6)       |
| Mauritania*                     | 28.9                      | 38.9               | 24.8               | 7.4               | 33.3                   | 38.9               | 20.8               | 7.0              | 23.5                | 48.8               | 21.2               | 6.5               |
|                                 | (23.7-34.2)               | (32.9-44.8)        | (19.7-29.9)        | (3.8-10.9)        | (21.0-45.5)            | (28.1-49.7)        | (10.6-31.1)        | (2.0-12.0)       | (2.8-44.2)          | (32.6-65.1)        | (7.7-34.7)         | (0.0-15.5)        |
| Mauritius*                      | 20.7                      | 47.1               | 26.7               | 5.5               | 18.5                   | 41.1               | 33.3               | 7.0              | 14.3                | 46.7               | 33.0               | 6.1               |
|                                 | (16.2-25.1)               | (43.5-50.7)        | (23.2-30.3)        | (3.8-7.2)         | (10.4-26.6)            | (35.2-47.0)        | (26.9-39.8)        | (2.8-11.2)       | (6.6-22.0)          | (34.7-58.6)        | (22.3-43.7)        | (2.5-9.6)         |
| Mozambique*                     | 30.4                      | 51.5               | 18.1               |                   | 36.0                   | 45.0               | 19.0               |                  | 40.2                | 48.1               | 11.7               |                   |
|                                 | (20.1-40.8)               | (46.1-56.8)        | (8.6-27.5)         |                   | (9.8-100.0)            | (3.9-94.0)         | (5.9-94.4)         |                  |                     |                    |                    |                   |
| Namibia*                        | 33.4                      | 41.0               | 19.5               | 6.1               | 33.5                   | 43.1               | 18.3               | 5.2              | 25.1                | 49.2               | 22.4               | 3.3               |
|                                 | (29.6-37.2)               | (38.2-43.7)        | (17.3-21.7)        | (4.3-8.0)         | (25.4-41.6)            | (36.4-49.7)        | (10.7-25.8)        | (1.6-8.7)        | (20.5-29.8)         | (40.2-58.2)        | (12.8-32.1)        | (0.0-6.7)         |
| Seychelles                      | 28.1                      | 43.8               | 22.1               | 6.0               | 27.0                   | 47.4               | 22.0               | 3.7              | 33.4                | 47.9               | 16.6               | 2.1               |
|                                 | (25.0-31.2)               | (40.8-46.8)        | (19.3-24.9)        | (4.6-7.5)         | (18.6-35.3)            | (38.5-56.2)        | (14.9-29.1)        | (0.3-7.1)        | (22.9-43.9)         | (36.5-59.2)        | (6.9-26.3)         | (0.0-5.1)         |
| United Republic<br>of Tanzania* | 18.7                      | 41.5               | 25.0               | 14.8              | 17.3                   | 35.9               | 38.6               | 8.2              | 16.2                | 47.5               | 23.2               | 13.1              |
|                                 | (11.2-26.2)               | (34.5-48.6)        | (20.6-29.3)        | (12.4-17.2)       |                        |                    |                    |                  | (3.4-59.0)          | (8.2-100.0)        | (7.4-100.0)        | (4.1-65.7)        |
| <b>Pooled estimates</b>         | <b>22.6</b>               | <b>41.9</b>        | <b>26.8</b>        | <b>9.9</b>        | <b>23.0</b>            | <b>41.4</b>        | <b>28.6</b>        | <b>6.9</b>       | <b>20.4</b>         | <b>40.3</b>        | <b>31.1</b>        | <b>6.8</b>        |
|                                 | <b>(14.2-31.0)</b>        | <b>(37.8-46.0)</b> | <b>(21.0-32.7)</b> | <b>(6.6-13.2)</b> | <b>(12.8-33.2)</b>     | <b>(38.1-44.7)</b> | <b>(21.4-35.7)</b> | <b>(4.1-9.7)</b> | <b>(10.9-29.9)</b>  | <b>(30.8-49.8)</b> | <b>(19.7-42.4)</b> | <b>(2.4-11.1)</b> |
| I <sup>2</sup> (%)              | 97.5                      | 89.2               | 95.8               | 94.4              | 89.9                   | 0.0                | 82.1               | 62.4             | 91.0                | 80.3               | 85.7               | 86.4              |
| <b>Region of the Americas</b>   |                           |                    |                    |                   |                        |                    |                    |                  |                     |                    |                    |                   |

|                      |                     |                     |                     |                   |                     |                     |                     |                   |                     |                     |                     |                    |
|----------------------|---------------------|---------------------|---------------------|-------------------|---------------------|---------------------|---------------------|-------------------|---------------------|---------------------|---------------------|--------------------|
| Antigua and Barbuda* | 24.2<br>(15.8-32.6) | 40.0<br>(29.7-50.3) | 31.6<br>(23.8-39.5) | 4.1<br>(0.9-7.3)  | 48.4<br>(8.5-88.4)  | 36.4<br>(25.4-47.4) | 15.2<br>(0.0-53.1)  | -                 | -                   | 57.3<br>(33.5-81.2) | 34.6<br>(5.9-63.3)  | 8.1<br>(0.0-28.5)  |
| Argentina*           | 9.7<br>(8.5-10.9)   | 42.0<br>(39.5-44.6) | 38.4<br>(36.1-40.7) | 9.8<br>(8.6-11.1) | 12.2<br>(8.0-16.3)  | 36.2<br>(31.9-40.6) | 42.4<br>(37.5-47.3) | 9.2<br>(7.1-11.2) | 15.2<br>(9.9-20.5)  | 36.4<br>(28.9-43.9) | 35.9<br>(28.2-43.5) | 12.5<br>(4.8-20.2) |
| Barbados*            | 36.7<br>(32.4-41.0) | 42.2<br>(38.5-45.9) | 17.3<br>(14.4-20.3) | 3.8<br>(2.4-5.1)  | 40.8<br>(30.1-51.5) | 40.3<br>(31.1-49.6) | 17.6<br>(11.3-23.9) | 1.3<br>(0.0-2.7)  | 44.7<br>(32.5-56.8) | 42.7<br>(30.8-54.6) | 11.2<br>(2.9-19.4)  | 1.5<br>(0.0-4.5)   |
| Belize*              | 23.9<br>(20.8-27.1) | 38.1<br>(34.2-41.9) | 30.4<br>(25.6-35.2) | 7.6<br>(5.6-9.7)  | 18.1<br>(9.0-27.2)  | 41.1<br>(32.9-49.4) | 32.6<br>(23.5-41.7) | 8.1<br>(3.9-12.4) | 25.5<br>(10.0-41.0) | 39.5<br>(27.6-51.5) | 27.9<br>(12.7-43.1) | 7.1<br>(0.8-13.3)  |
| Bolivia              | 16.5<br>(14.0-19.0) | 41.4<br>(39.0-43.7) | 32.9<br>(29.9-36.0) | 9.2<br>(7.5-11.0) | 9.8<br>(5.7-13.8)   | 48.5<br>(38.4-58.5) | 35.2<br>(27.4-43.1) | 6.6<br>(4.0-9.2)  | 17.5<br>(13.1-21.8) | 38.3<br>(30.9-45.6) | 39.1<br>(33.2-45.0) | 5.2<br>(2.5-7.9)   |
| Chile                | 15.0<br>(11.9-18.0) | 42.5<br>(37.8-47.2) | 33.4<br>(29.7-37.1) | 9.2<br>(7.0-11.3) | 18.9<br>(13.8-24.1) | 42.2<br>(34.6-49.8) | 30.5<br>(21.0-40.0) | 8.4<br>(2.3-14.5) | 10.4<br>(6.4-14.4)  | 43.2<br>(30.7-55.8) | 35.9<br>(22.5-49.3) | 10.4<br>(4.1-16.7) |
| Bahamas*             | 37.1<br>(32.7-41.6) | 44.9<br>(41.0-48.8) | 15.6<br>(12.3-18.9) | 2.4<br>(1.2-3.6)  | 29.0<br>(20.9-37.1) | 47.1<br>(38.9-55.3) | 23.0<br>(13.5-32.6) | 0.8<br>(0.0-2.6)  | 28.7<br>(18.6-38.8) | 48.7<br>(38.1-59.3) | 16.7<br>(7.3-26.0)  | 5.9<br>(0.0-13.4)  |
| Costa Rica*          | 19.2<br>(15.2-23.1) | 41.2<br>(38.1-44.3) | 30.3<br>(27.6-32.9) | 9.4<br>(7.8-11.0) | 21.6<br>(13.1-30.0) | 39.5<br>(31.7-47.2) | 29.9<br>(21.9-37.9) | 9.1<br>(5.0-13.1) | 22.4<br>(14.9-29.9) | 42.6<br>(36.9-48.4) | 28.1<br>(19.5-36.8) | 6.8<br>(0.0-14.4)  |
| Curaçao*             | 31.5<br>(27.3-35.7) | 45.8<br>(42.1-49.5) | 19.1<br>(14.5-23.7) | 3.6<br>(1.9-5.3)  | 42.3<br>(30.4-54.2) | 37.2<br>(27.3-47.2) | 14.8<br>(4.8-24.8)  | 5.6<br>(0.8-10.5) | 25.7<br>(10.8-40.6) | 44.8<br>(27.6-61.9) | 17.8<br>(1.9-33.7)  | 11.8<br>(1.8-21.7) |
| El Salvador*         | 18.8<br>(14.8-22.8) | 42.9<br>(40.5-45.3) | 30.9<br>(26.9-34.9) | 7.4<br>(5.2-9.7)  | 15.9<br>(10.7-21.1) | 45.1<br>(36.0-54.2) | 30.9<br>(19.1-42.6) | 8.1<br>(3.8-12.5) | 23.2<br>(14.4-31.9) | 40.2<br>(26.7-53.6) | 27.0<br>(16.5-37.6) | 9.6<br>(4.4-14.9)  |
| Guatemala            | 19.5<br>(14.9-24.0) | 41.4<br>(36.8-46.0) | 33.4<br>(28.8-38.0) | 5.7<br>(3.3-8.1)  | 12.9<br>(6.6-19.1)  | 54.7<br>(49.2-60.2) | 24.7<br>(19.4-30.0) | 7.8<br>(3.8-11.7) | 13.7<br>(10.2-17.2) | 56.9<br>(50.9-63.0) | 28.4<br>(19.4-37.4) | 0.9<br>(0.1-1.8)   |
| Guyana*              | 34.0<br>(28.7-39.3) | 46.4<br>(43.4-49.3) | 16.6<br>(12.1-21.0) | 3.1<br>(1.9-4.3)  | 35.7<br>(25.5-45.9) | 46.1<br>(37.3-54.8) | 14.3<br>(8.3-20.3)  | 3.9<br>(0.7-7.1)  | 43.8<br>(28.7-58.8) | 36.2<br>(26.4-46.0) | 15.3<br>(7.6-23.0)  | 4.7<br>(0.1-9.3)   |
| Honduras*            | 17.2<br>(13.5-20.9) | 44.3<br>(40.0-48.6) | 30.9<br>(26.2-35.6) | 7.6<br>(5.7-9.5)  | 14.8<br>(8.4-21.3)  | 39.8<br>(31.5-48.0) | 38.6<br>(30.8-46.4) | 6.8<br>(3.8-9.9)  | 11.3<br>(4.9-17.6)  | 43.2<br>(35.0-51.5) | 36.3<br>(24.1-48.4) | 9.3<br>(2.6-16.0)  |
| Peru                 | 17.1                | 43.6                | 34.1                | 5.2               | 15.9                | 46.4                | 32.0                | 5.7               | 21.5                | 42.1                | 31.9                | 4.4                |

|                                     |                    |                    |                    |                  |                    |                    |                    |                  |                    |                    |                    |                  |
|-------------------------------------|--------------------|--------------------|--------------------|------------------|--------------------|--------------------|--------------------|------------------|--------------------|--------------------|--------------------|------------------|
|                                     | (13.7-20.5)        | (41.2-46.1)        | (30.3-37.9)        | (3.8-6.6)        | (10.7-21.1)        | (39.8-53.0)        | (23.6-40.4)        | (2.7-8.6)        | (13.1-30.0)        | (32.0-52.2)        | (22.0-41.8)        | (2.2-6.7)        |
| Suriname                            | 23.4               | 43.0               | 27.6               | 5.9              | 22.5               | 35.9               | 29.0               | 12.5             | 21.9               | 39.8               | 33.9               | 4.3              |
|                                     | (17.9-29.0)        | (39.1-47.0)        | (22.3-33.0)        | (4.5-7.3)        | (12.0-33.0)        | (29.3-42.5)        | (21.2-36.9)        | (3.6-21.5)       | (9.8-34.1)         | (30.2-49.4)        | (25.8-42.0)        | (0.0-11.3)       |
| Trinidad and Tobago*                | 29.0               | 46.3               | 20.3               | 4.4              | 32.4               | 44.9               | 20.0               | 2.7              | 30.8               | 44.7               | 17.6               | 7.0              |
|                                     | (24.7-33.2)        | (42.9-49.6)        | (18.1-22.5)        | (3.3-5.5)        | (22.9-41.9)        | (36.5-53.2)        | (13.4-26.6)        | (0.9-4.4)        | (21.2-40.3)        | (35.8-53.6)        | (11.5-23.6)        | (0.0-14.1)       |
| Uruguay*                            | 11.6               | 40.7               | 36.4               | 11.4             | 12.4               | 44.7               | 35.5               | 7.4              | 9.7                | 31.2               | 45.3               | 13.8             |
|                                     | (9.2-14.0)         | (37.6-43.8)        | (33.5-39.3)        | (9.2-13.6)       | (8.8-16.0)         | (38.0-51.4)        | (27.7-43.3)        | (3.3-11.5)       | (4.7-14.7)         | (24.3-38.0)        | (37.4-53.3)        | (9.1-18.5)       |
| <b>Pooled estimates</b>             | <b>22.5</b>        | <b>42.9</b>        | <b>28.2</b>        | <b>6.4</b>       | <b>21.2</b>        | <b>42.8</b>        | <b>27.9</b>        | <b>6.4</b>       | <b>21.2</b>        | <b>40.4</b>        | <b>28.1</b>        | <b>6.5</b>       |
|                                     | <b>(18.2-26.7)</b> | <b>(41.8-43.9)</b> | <b>(24.3-32.1)</b> | <b>(5.1-7.8)</b> | <b>(17.1-25.2)</b> | <b>(39.9-45.7)</b> | <b>(23.3-32.5)</b> | <b>(4.4-8.3)</b> | <b>(17.2-25.2)</b> | <b>(36.0-44.8)</b> | <b>(22.7-33.4)</b> | <b>(4.3-8.6)</b> |
| <b>I<sup>2</sup>(%)</b>             | 96.6               | 37.1               | 95.3               | 91.5             | 83.8               | 60.0               | 83.3               | 86.5             | 80.0               | 73.9               | 82.7               | 80.6             |
| <b>Eastern Mediterranean Region</b> |                    |                    |                    |                  |                    |                    |                    |                  |                    |                    |                    |                  |
| Afghanistan                         | 13.2               | 40.9               | 37.7               | 8.2              | 17.2               | 46.5               | 26.5               | 9.8              | 17.3               | 48.7               | 22.6               | 11.4             |
|                                     | (9.3-17.2)         | (33.3-48.6)        | (27.4-48.0)        | (5.3-11.0)       | (8.8-25.7)         | (37.5-55.5)        | (17.7-35.2)        | (3.5-16.1)       | (8.8-25.8)         | (37.0-60.4)        | (14.1-31.1)        | (4.9-17.8)       |
| Egypt                               | 21.4               | 47.0               | 27.2               | 4.4              | 32.3               | 43.4               | 22.7               | 1.6              | 26.0               | 44.1               | 25.7               | 4.2              |
|                                     | (16.6-26.1)        | (40.5-53.5)        | (19.6-34.8)        | (2.6-6.3)        | (25.2-39.3)        | (37.7-49.1)        | (16.6-28.8)        | (0.0-3.5)        | (17.1-34.9)        | (32.7-55.5)        | (13.7-37.8)        | (0.7-7.6)        |
| Iraq*                               | 25.4               | 39.1               | 27.5               | 8.0              | 31.2               | 34.8               | 24.4               | 9.6              | 35.8               | 36.7               | 20.2               | 7.3              |
|                                     | (21.4-29.4)        | (35.3-43.0)        | (23.5-31.5)        | (5.8-10.2)       | (22.4-40.0)        | (25.6-44.0)        | (14.3-34.6)        | (5.3-13.8)       | (26.9-44.8)        | (25.5-48.0)        | (12.6-27.7)        | (0.0-15.0)       |
| Kuwait*                             | 31.7               | 50.4               | 14.7               | 3.2              | 35.1               | 50.3               | 13.1               | 1.5              | 43.0               | 51.6               | 3.4                | 2.0              |
|                                     | (26.3-37.0)        | (45.3-55.5)        | (10.7-18.8)        | (1.6-4.8)        | (25.2-44.9)        | (39.9-60.7)        | (7.2-19.0)         | (0.0-4.0)        | (33.0-53.0)        | (41.9-61.3)        | (0.7-6.1)          | (0.0-4.5)        |
| Lebanon*                            | 26.7               | 47.4               | 23.1               | 2.8              | 25.3               | 51.0               | 21.9               | 1.8              | 21.5               | 52.6               | 23.0               | 2.9              |
|                                     | (22.4-31.0)        | (42.4-52.4)        | (16.3-29.9)        | (2.0-3.6)        | (15.9-34.8)        | (41.8-60.1)        | (13.0-30.7)        | (0.4-3.2)        | (12.6-30.4)        | (41.4-63.8)        | (14.8-31.1)        | (0.0-6.6)        |
| Morocco*                            | 15.1               | 37.2               | 37.8               | 9.9              | 12.9               | 35.7               | 40.7               | 10.7             | 11.2               | 32.3               | 45.5               | 11.0             |
|                                     | (12.9-17.2)        | (33.7-40.7)        | (33.8-41.8)        | (8.3-11.6)       | (8.9-16.9)         | (28.9-42.5)        | (32.0-49.5)        | (7.0-14.4)       | (5.9-16.5)         | (25.5-39.2)        | (37.2-53.8)        | (5.3-16.7)       |
| Oman*                               | 23.4               | 52.7               | 20.6               | 3.2              | 29.1               | 47.1               | 19.1               | 4.7              | 25.2               | 50.7               | 22.0               | 2.1              |
|                                     | (19.8-27.0)        | (50.0-55.5)        | (17.7-23.6)        | (2.2-4.2)        | (21.7-36.5)        | (39.2-55.0)        | (12.0-26.3)        | (1.9-7.5)        | (19.2-31.1)        | (40.8-60.6)        | (13.1-30.9)        | (0.0-4.2)        |





| <b>Region</b>                           |             |             |             |             |             |             |             |            |             |             |             |            |
|-----------------------------------------|-------------|-------------|-------------|-------------|-------------|-------------|-------------|------------|-------------|-------------|-------------|------------|
| Brunei                                  | 33.5        | 49.6        | 14.8        | 2.2         | 37.8        | 49.3        | 12.4        | 0.6        | 35.1        | 52.7        | 12.2        |            |
| Darussalam*                             | (30.6-36.4) | (46.4-52.7) | (12.3-17.2) | (1.3-3.0)   | (31.0-44.6) | (42.8-55.7) | (7.1-17.6)  | (0.0-1.8)  | (26.6-43.6) | (42.7-62.7) | (7.1-17.3)  |            |
| Cambodia*                               | 19.8        | 42.4        | 31.9        | 5.9         | 16.4        | 49.9        | 30.6        | 3.1        | 29.4        | 31.6        | 34.6        | 4.4        |
|                                         | (16.3-23.4) | (39.2-45.6) | (27.0-36.8) | (4.8-7.0)   | (9.4-23.4)  | (43.2-56.7) | (23.2-38.1) | (0.9-5.2)  | (15.9-42.9) | (22.2-41.1) | (23.8-45.4) | (0.5-8.3)  |
| Kiribati                                | 18.8        | 44.1        | 25.9        | 11.2        | 27.3        | 39.8        | 22.5        | 10.3       | 17.6        | 50.5        | 26.0        | 5.8        |
|                                         | (16.0-21.7) | (39.3-48.9) | (22.3-29.4) | (8.2-14.2)  | (20.5-34.2) | (33.2-46.4) | (14.7-30.3) | (4.2-16.5) | (8.3-27.0)  | (35.9-65.2) | (14.6-37.4) | (0.6-11.1) |
| Lao People's<br>Democratic<br>Republic* | 25.6        | 49.1        | 20.8        | 4.5         | 24.8        | 47.8        | 23.0        | 4.4        | 31.7        | 47.6        | 17.3        | 3.4        |
|                                         | (21.2-30.0) | (46.0-52.2) | (16.4-25.1) | (3.1-6.0)   | (17.3-32.3) | (40.6-55.1) | (15.3-30.6) | (1.5-7.3)  | (22.0-41.4) | (42.4-52.7) | (9.3-25.4)  | (0.0-7.5)  |
| Malaysia*                               | 21.7        | 45.7        | 25.5        | 7.0         | 21.0        | 46.7        | 24.6        | 7.7        | 23.4        | 43.9        | 27.0        | 5.7        |
|                                         | (19.9-23.6) | (44.1-47.4) | (23.6-27.5) | (6.1-7.9)   | (18.2-23.9) | (43.2-50.2) | (21.3-28.0) | (5.8-9.5)  | (19.7-27.1) | (38.9-48.9) | (22.7-31.3) | (3.3-8.1)  |
| Mongolia                                | 7.3         | 31.7        | 45.3        | 15.8        | 12.1        | 31.4        | 44.5        | 12.0       | 11.6        | 38.2        | 41.8        | 8.3        |
|                                         | (6.0-8.6)   | (28.8-34.7) | (42.8-47.7) | (13.5-18.0) | (7.8-16.5)  | (26.3-36.5) | (39.1-49.8) | (8.4-15.6) | (7.6-15.7)  | (30.5-46.0) | (33.1-50.6) | (4.8-11.9) |
| Philippines                             | 23.1        | 47.0        | 25.4        | 4.5         | 25.2        | 44.4        | 26.7        | 3.7        | 32.3        | 44.4        | 17.7        | 5.6        |
|                                         | (20.4-25.8) | (44.7-49.3) | (23.0-27.8) | (3.5-5.5)   | (18.4-31.9) | (40.7-48.1) | (21.1-32.2) | (1.6-5.8)  | (22.4-42.2) | (39.0-49.8) | (10.5-24.9) | (1.7-9.5)  |
| Samoa                                   | 28.6        | 46.7        | 18.3        | 6.4         | 26.3        | 53.4        | 17.2        | 3.1        | 33.6        | 47.4        | 19.0        |            |
|                                         | (23.8-33.3) | (42.7-50.8) | (15.6-21.1) | (4.6-8.1)   | (16.5-36.1) | (41.4-65.5) | (12.0-22.4) | (0.3-5.9)  | (22.8-44.4) | (37.1-57.7) | (12.6-25.4) |            |
| Solomon Islands                         | 21.7        | 44.2        | 26.2        | 7.8         | 8.0         | 53.7        | 27.7        | 10.6       | 16.2        | 36.8        | 45.1        | 1.9        |
|                                         | (14.5-29.0) | (36.6-51.9) | (18.0-34.4) | (3.1-12.6)  | (0.5-15.6)  | (41.0-66.5) | (16.6-38.7) | (6.0-15.1) | (6.4-26.0)  | (18.5-55.0) | (27.6-62.6) | (0.0-6.4)  |
| Tonga                                   | 27.6        | 44.1        | 20.6        | 7.7         | 29.1        | 44.4        | 20.3        | 6.2        | 35.1        | 40.6        | 16.0        | 8.2        |
|                                         | (24.7-30.6) | (41.3-46.9) | (17.8-23.4) | (6.1-9.3)   | (22.5-35.6) | (37.0-51.7) | (14.1-26.6) | (2.1-10.4) | (23.9-46.4) | (29.9-51.3) | (8.9-23.2)  | (2.6-13.9) |
| Vanuatu                                 | 17.4        | 29.4        | 45.6        | 7.6         | 13.7        | 34.0        | 36.9        | 15.4       | 7.3         | 33.7        | 55.3        | 3.7        |
|                                         | (10.9-24.0) | (19.3-39.6) | (32.2-59.0) | (2.1-13.0)  | (3.9-23.4)  | (9.7-58.3)  | (27.0-46.8) | (0.0-37.7) | (5.8-8.9)   | (17.4-50.0) | (31.6-78.9) | (0.0-14.5) |
| Vietnam*                                | 5.8         | 34.3        | 49.6        | 10.3        | 10.5        | 29.6        | 51.7        | 8.1        | 7.8         | 42.4        | 38.5        | 11.3       |
|                                         | (4.1-7.5)   | (31.0-37.6) | (45.3-53.8) | (8.1-12.5)  | (5.9-15.1)  | (20.3-38.9) | (42.6-60.9) | (4.6-11.7) | (0.2-15.4)  | (26.8-58.1) | (23.9-53.1) | (6.4-16.1) |
| Wallis and Futuna                       | 23.0        | 50.7        | 20.7        | 5.6         | 20.9        | 48.4        | 20.2        | 10.5       | 18.3        | 64.1        | 17.6        |            |

|                          |              |             |             |            |             |             |             |            |             |             |             |            |
|--------------------------|--------------|-------------|-------------|------------|-------------|-------------|-------------|------------|-------------|-------------|-------------|------------|
|                          | (19.1-26.8)  | (46.1-55.3) | (17.6-23.8) | (3.7-7.5)  | (11.0-30.9) | (34.6-62.2) | (11.3-29.1) | (2.2-18.8) | (4.3-32.3)  | (46.8-81.4) | (6.4-28.7)  |            |
| <b>Pooled estimates</b>  | <b>21.0</b>  | <b>43.4</b> | <b>28.1</b> | <b>7.3</b> | <b>20.9</b> | <b>44.1</b> | <b>27.3</b> | <b>6.3</b> | <b>22.5</b> | <b>43.9</b> | <b>25.9</b> | <b>5.6</b> |
|                          | (15.6-26.5)  | (40.2-46.6) | (22.3-33.9) | (5.5-9.0)  | (16.4-25.4) | (40.1-48.0) | (21.6-33.0) | (4.0-8.7)  | (16.2-28.8) | (40.4-47.5) | (20.3-31.6) | (4.0-7.3)  |
| <b>I<sup>2</sup>(%)</b>  | 98.1         | 92.1        | 97.7        | 93.9       | 85.9        | 75.4        | 90.5        | 88.9       | 93.1        | 46.6        | 83.0        | 41.6       |
| <b>Total</b>             |              |             |             |            |             |             |             |            |             |             |             |            |
| <b>Pooled estimates*</b> | <b>23.4</b>  | <b>43.1</b> | <b>25.6</b> | <b>7.0</b> | <b>23.9</b> | <b>42.7</b> | <b>25.3</b> | <b>5.6</b> | <b>23.0</b> | <b>43.0</b> | <b>26.3</b> | <b>5.2</b> |
|                          | (20.96-25.8) | (42.1-44.0) | (22.9-28.3) | (5.5-8.4)  | (20.2-27.7) | (41.2-44.3) | (21.9-28.8) | (4.5-6.7)  | (20.3-25.7) | (40.7-45.4) | (23.1-29.4) | (3.8-6.6)  |
| <b>I<sup>2</sup>(%)</b>  | 0            | 0           | 33.8        | 62.0       | 47.1        | 0           | 48.3        | 20.3       | 0           | 0           | 0           | 50.4       |

\*There was significantly difference in the prevalence of joint physical behavior between different BMI group ( $P<0.05$ ).

**Table S4.** The percentage of physically active for at least 60 min among young adolescents aged 12-15 years.

| Percentage of physically active adolescents on 7 days per week (95% CI) |                                   |                                   |                                  |                                   |                                    |                                   |                                   |                                  |
|-------------------------------------------------------------------------|-----------------------------------|-----------------------------------|----------------------------------|-----------------------------------|------------------------------------|-----------------------------------|-----------------------------------|----------------------------------|
|                                                                         | Overall                           | Boys, %                           | Girls, %                         | 12-13, %                          | 14-15, %                           | Normal weight, %                  | Overweight, %                     | Obesity, %                       |
| <b>Africa Region</b>                                                    |                                   |                                   |                                  |                                   |                                    |                                   |                                   |                                  |
| Algeria*                                                                | 15.0<br>(13.5-16.6)               | 23.7<br>(20.4-27.1)*              | 7.7<br>(6.1-9.2)                 | 15.1<br>(13.1-17.1)               | 14.8<br>(12.6-17.1)                | 15.4<br>(13.7-17.1)               | 15.0<br>(9.0-20.9)                | 14.2<br>(6.5-22.0)               |
| Benin                                                                   | 24.4<br>(20.7-28.0)               | 27.3<br>(23.4-31.1)*              | 19.3<br>(14.1-24.6)              | 26.4<br>(22.2-30.5)               | 23.9<br>(19.9-27.9)                | 25.6<br>(21.7-29.5)               | 21.7<br>(14.1-29.3)               | 19.2<br>(13.8-24.6)              |
| Mauritania*                                                             | 10.5<br>(7.9-13.2)                | 13.9<br>(9.5-18.3)*               | 6.8<br>(4.7-8.9)                 | 9.3<br>(5.3-13.2)                 | 11.1<br>(8.1-14.1)                 | 10.6<br>(6.4-14.8)                | 6.4<br>(0.2-12.5)                 | 6.5<br>(0.0-15.5)                |
| Mauritius*                                                              | 19.4<br>(15.4-23.4)               | 26.0<br>(21.3-30.7)*              | 13.3<br>(10.8-15.7)              | 18.1<br>(13.9-22.3)               | 20.2<br>(15.6-24.8)                | 19.6<br>(15.6-23.7)               | 20.6<br>(15.3-25.9)               | 42.0<br>(29.3-54.7)              |
| Mozambique*                                                             | 11.0<br>(4.4-17.7)                | 12.6<br>(7.2-18.0)*               | 8.7<br>(0.0-17.6)                | 13.7<br>(9.3-18.0)                | 10.1<br>(2.6-17.5)                 | 8.3<br>(0.0-18.1)                 | 7.4<br>(0.0-94.5)                 | -                                |
| Namibia*                                                                | 13.8<br>(11.5-16.1)               | 14.5<br>(11.6-17.4)               | 13.3<br>(10.6-15.9)              | 13.8<br>(10.4-17.3)               | 13.7<br>(11.5-15.8)                | 13.8<br>(11.3-16.2)               | 13.8<br>(6.2-21.5)                | 13.3<br>(4.0-22.6)               |
| Seychelles                                                              | 17.5<br>(15.5-19.4)               | 19.8<br>(16.3-23.3)*              | 15.4<br>(12.8-18.0)              | 16.1<br>(13.1-19.1)               | 18.7<br>(16.2-21.3)                | 19.1<br>(16.8-21.4)*              | 14.5<br>(8.9-20.1)                | 12.3<br>(4.1-20.6)               |
| United Republic of Tanzania*                                            | 20.7<br>(17.0-24.3)               | 23.6<br>(17.8-29.4)*              | 18.0<br>(14.6-21.4)              | 19.8<br>(16.4-23.2)               | 21.3<br>(15.8-26.9)                | 24.5<br>(18.0-31.1)               | -                                 | 17.1<br>(0-100.0)                |
| <b>Pooled estimates</b>                                                 | <b>16.6</b><br><b>(13.9-19.3)</b> | <b>20.2</b><br><b>(16.2-24.2)</b> | <b>12.8</b><br><b>(9.6-16.0)</b> | <b>16.5</b><br><b>(13.5-19.5)</b> | <b>16.7</b><br><b>(13.58-19.7)</b> | <b>17.4</b><br><b>(14.2-20.5)</b> | <b>15.2</b><br><b>(11.0-19.5)</b> | <b>17.0</b><br><b>(9.9-24.0)</b> |
| I <sup>2</sup> (%)                                                      | 87.4                              | 87.2                              | 90.8                             | 84.2                              | 84.1                               | 86.2                              | 59.9                              | 75.5                             |
| <b>Region of the Americas</b>                                           |                                   |                                   |                                  |                                   |                                    |                                   |                                   |                                  |

|                      |                     |                      |                     |                     |                     |                      |                     |                     |
|----------------------|---------------------|----------------------|---------------------|---------------------|---------------------|----------------------|---------------------|---------------------|
| Antigua and Barbuda* | 22.4<br>(18.5-26.4) | 28.4<br>(22.3-34.6)* | 16.4<br>(12.4-20.3) | 20.4<br>(15.8-25.0) | 23.6<br>(18.5-28.6) | 26.8<br>(18.5-35.1)* | 15.1<br>(13.3-16.9) | 49.4<br>(14.7-84.0) |
| Argentina*           | 16.4<br>(15.2-17.6) | 21.2<br>(19.7-22.7)* | 12.1<br>(10.9-13.4) | 17.0<br>(14.4-19.7) | 16.2<br>(15.1-17.3) | 17.3<br>(15.7-18.9)  | 18.1<br>(15.0-21.2) | 17.1<br>(12.3-21.8) |
| Barbados*            | 19.4<br>(16.9-21.9) | 25.0<br>(21.1-28.9)* | 13.7<br>(10.5-16.8) | 17.5<br>(12.6-22.4) | 19.9<br>(16.7-23.0) | 20.9<br>(18.0-23.8)* | 10.7<br>(4.9-16.6)  | 14.8<br>(7.7-21.8)  |
| Belize*              | 20.0<br>(17.3-22.8) | 23.6<br>(20.3-26.9)* | 16.7<br>(14.2-19.2) | 20.8<br>(17.5-24.2) | 19.4<br>(15.9-22.9) | 21.2<br>(18.0-24.4)  | 16.5<br>(8.9-24.0)  | 19.0<br>(4.4-33.6)  |
| Bolivia              | 13.4<br>(11.7-15.2) | 16.5<br>(14.1-18.9)* | 11.2<br>(8.6-13.9)  | 14.0<br>(10.8-17.2) | 13.7<br>(11.6-15.8) | 14.1<br>(12.2-15.9)  | 13.7<br>(7.9-19.5)  | 12.4<br>(7.9-16.8)  |
| Chile                | 15.5<br>(13.1-17.9) | 22.5<br>(18.4-26.6)* | 8.7<br>(5.9-11.4)   | 17.1<br>(13.7-20.5) | 14.5<br>(11.5-17.5) | 16.3<br>(13.3-19.3)  | 11.4<br>(6.0-16.9)  | 12.9<br>(4.9-20.8)  |
| Bahamas*             | 15.5<br>(12.0-19.0) | 19.6<br>(13.4-25.8)* | 11.9<br>(9.3-14.5)  | 15.0<br>(11.3-18.6) | 16.3<br>(10.8-21.8) | 15.5<br>(12.1-19.0)  | 11.9<br>(5.8-18.0)  | 18.7<br>(8.5-29.0)  |
| Costa Rica*          | 18.0<br>(15.8-20.1) | 24.7<br>(21.9-27.6)* | 11.4<br>(8.8-13.9)  | 19.0<br>(16.3-21.7) | 17.5<br>(14.7-20.3) | 18.7<br>(16.3-21.1)  | 15.5<br>(10.2-20.8) | 15.6<br>(9.7-21.5)  |
| Curaçao*             | 11.6<br>(10.0-13.2) | 15.5<br>(12.9-18.1)* | 7.9<br>(6.0-9.8)    | 11.5<br>(8.4-14.6)  | 11.6<br>(9.6-13.5)  | 10.7<br>(8.6-12.8)   | 11.3<br>(3.8-18.8)  | 18.5<br>(3.3-33.6)  |
| El Salvador*         | 12.5<br>(9.9-15.0)  | 15.9<br>(12.5-19.3)* | 9.1<br>(6.7-11.5)   | 8.7<br>(5.1-12.3)*  | 14.2<br>(11.7-16.7) | 12.3<br>(9.3-15.2)   | 16.1<br>(11.2-21.1) | 11.4<br>(5.6-17.3)  |
| Guatemala            | 11.1<br>(7.8-14.5)  | 12.8<br>(8.2-17.4)   | 9.7<br>(6.8-12.5)   | 12.3<br>(9.8-14.7)  | 10.8<br>(6.5-15.2)  | 11.6<br>(8.4-14.9)*  | 8.0<br>(1.4-14.6)   | 3.1<br>(1.6-4.7)    |
| Guyana*              | 14.9<br>(11.1-18.8) | 18.4<br>(12.6-24.2)* | 12.1<br>(8.9-15.2)  | 13.6<br>(6.2-20.9)  | 15.6<br>(12.5-18.6) | 15.8<br>(11.7-19.8)  | 13.9<br>(8.1-19.7)  | 15.3<br>(6.0-24.6)  |
| Honduras*            | 15.1<br>(12.7-17.6) | 18.1<br>(15.2-21.1)* | 12.6<br>(9.5-15.7)  | 14.6<br>(9.8-19.4)  | 15.8<br>(12.8-18.7) | 15.1<br>(11.5-18.7)  | 18.5<br>(10.7-26.3) | 16.2<br>(3.5-28.8)  |
| Peru                 | 15.2                | 17.1                 | 13.3                | 18.1                | 14.1                | 15.3                 | 13.2                | 13.2                |

|                                             |                    |                    |                    |                    |                    |                    |                    |                    |
|---------------------------------------------|--------------------|--------------------|--------------------|--------------------|--------------------|--------------------|--------------------|--------------------|
|                                             | (13.2-17.2)        | (14.4-19.9)*       | (11.1-15.5)        | (14.1-22.0)*       | (12.5-15.8)        | (13.2-17.4)        | (8.0-18.3)         | (7.5-19.0)         |
| Suriname                                    | 20.2               | 24.8               | 16.2               | 21.2               | 19.6               | 20.7               | 20.0               | 15.3               |
|                                             | (16.7-23.7)        | (20.0-29.6)*       | (13.1-19.4)        | (14.9-27.6)        | (16.0-23.1)        | (17.8-23.7)        | (10.0-30.0)        | (4.4-26.2)         |
| Trinidad and<br>Tobago*                     | 20.2               | 25.0               | 15.8               | 20.7               | 20.0               | 21.4               | 12.9               | 15.8               |
|                                             | (17.1-23.3)        | (21.5-28.6)*       | (13.0-18.5)        | (17.5-24.0)        | (16.4-23.6)        | (17.7-25.1)*       | (6.4-19.4)         | (4.1-27.5)         |
| Uruguay*                                    | 16.1               | 23.6               | 9.6                | 16.3               | 16.0               | 16.4               | 13.8               | 16.1               |
|                                             | (14.2-18.0)        | (20.9-26.4)*       | (8.0-11.2)         | (13.2-19.4)        | (14.0-18.1)        | (14.5-18.3)        | (10.1-17.6)        | (7.1-25.2)         |
| <b>Pooled estimates</b>                     | <b>16.2</b>        | <b>20.6</b>        | <b>12.1</b>        | <b>16.3</b>        | <b>16.1</b>        | <b>16.7</b>        | <b>14.6</b>        | <b>14.5</b>        |
|                                             | <b>(14.2-18.0)</b> | <b>(18.7-22.5)</b> | <b>(10.8-13.4)</b> | <b>(14.5-18.0)</b> | <b>(14.8-17.4)</b> | <b>(15.1-18.3)</b> | <b>(13.4-15.8)</b> | <b>(10.6-18.5)</b> |
| <b>I<sup>2</sup>(%)</b>                     | 83.2               | 82.3               | 78.6               | 75.1               | 75.0               | 83.2               | 7.0                | 83.4               |
| <b>Eastern<br/>Mediterranean<br/>Region</b> |                    |                    |                    |                    |                    |                    |                    |                    |
| Afghanistan                                 | 8.8                | 7.5                | 11.1               | 9.5                | 8.9                | 8.3                | 8.9                | 9.9                |
|                                             | (5.8-11.9)         | (3.4-11.6)*        | (9.0-13.2)         | (5.1-13.9)         | (5.7-12.1)         | (5.0-11.7)         | (4.7-13.0)         | (1.5-18.4)         |
| Egypt                                       | 12.6               | 18.6               | 7.0                | 13.5               | 11.6               | 13.2               | 8.2                | 13.8               |
|                                             | (8.9-16.3)         | (13.5-23.7)*       | (4.7-9.3)          | (7.8-19.1)         | (8.3-14.8)         | (9.4-17.1)         | (3.9-12.6)         | (6.5-21.0)         |
| Iraq*                                       | 14.7               | 19.5               | 8.9                | 16.8               | 13.7               | 14.7               | 14.6               | 16.2               |
|                                             | (12.3-17.1)        | (16.6-22.4)*       | (5.5-12.4)         | (12.8-20.8)        | (11.2-16.3)        | (12.3-17.1)        | (9.2-20.0)         | (7.2-25.1)         |
| Kuwait*                                     | 16.8               | 18.9               | 14.7               | 19.1               | 15.9               | 17.3               | 15.6               | 11.9               |
|                                             | (14.1-19.5)        | (15.7-22.2)*       | (12.8-16.5)        | (15.3-22.8)        | (13.2-18.6)        | (14.2-20.4)        | (9.0-22.3)         | (5.4-18.5)         |
| Lebanon*                                    | 23.4               | 31.2               | 16.6               | 26.0               | 21.8               | 24.2               | 26.2               | 23.4               |
|                                             | (20.6-26.3)        | (26.1-36.4)*       | (14.5-18.8)        | (22.8-29.3)        | (19.1-24.5)        | (20.1-28.2)        | (19.7-32.7)        | (14.9-31.9)        |
| Morocco*                                    | 12.4               | 14.7               | 10.1               | 11.9               | 12.8               | 12.9               | 13.0               | 12.3               |
|                                             | (11.1-13.7)        | (13.1-16.2)*       | (7.8-12.4)         | (9.8-14.0)         | (11.6-14.0)        | (11.9-13.9)        | (7.4-18.5)         | (6.9-17.7)         |
| Oman*                                       | 13.0               | 16.4               | 10.1               | 14.2               | 12.6               | 13.2               | 14.8               | 15.0               |
|                                             | (10.5-15.5)        | (14.0-18.8)*       | (7.8-12.3)         | (10.9-17.6)        | (9.8-15.4)         | (10.1-16.3)        | (7.5-22.2)         | (9.6-20.5)         |



| <b>Region</b>                           |             |              |             |             |             |             |             |             |
|-----------------------------------------|-------------|--------------|-------------|-------------|-------------|-------------|-------------|-------------|
| Brunei                                  | 11.5        | 18.4         | 5.0         | 10.7        | 11.8        | 12.6        | 8.8         | 3.4         |
| Darussalam*                             | (10.1-12.8) | (16.0-20.9)* | (3.5-6.6)   | (8.8-12.7)  | (10.0-13.6) | (11.0-14.3) | (4.2-13.4)  | (0.1-6.6)   |
| Cambodia*                               | 6.3         | 8.2          | 4.7         | 6.3         | 6.4         | 6.0         | 3.9         | 4.9         |
|                                         | (4.5-8.2)   | (6.1-10.3)   | (2.0-7.3)   | (3.0-9.6)   | (4.5-8.4)   | (4.4-7.6)   | (1.3-6.5)   | (0.6-9.2)   |
| Kiribati                                | 17.1        | 20.7         | 14.2        | 14.6        | 18.1        | 16.9        | 20.3        | 12.0        |
|                                         | (15.0-19.1) | (16.6-24.7)* | (11.9-16.6) | (10.7-18.4) | (16.1-20.1) | (14.2-19.7) | (13.1-27.7) | (3.2-20.8)  |
| Lao People's<br>Democratic<br>Republic* | 16.2        | 24.6         | 8.8         | 17.0        | 16.2        | 16.2        | 15.0        | 16.1        |
|                                         | (13.6-18.9) | (20.3-28.9)* | (6.3-11.3)  | (9.1-24.9)  | (13.3-19.0) | (13.1-19.3) | (10.3-19.6) | (9.8-22.4)  |
| Malaysia*                               | 13.8        | 19.4         | 8.3         | 13.6        | 13.9        | 14.4        | 12.9        | 10.6        |
|                                         | (12.8-14.8) | (18.0-20.8)* | (7.3-9.2)   | (12.2-14.9) | (12.5-15.3) | (13.3-15.6) | (10.4-15.3) | (8.0-13.3)  |
| Mongolia                                | 26.9        | 31.5         | 22.4        | 28.5        | 25.5        | 28.0        | 22.0        | 21.1        |
|                                         | (25.3-28.4) | (28.8-34.1)* | (20.1-24.7) | (25.5-31.6) | (23.3-27.5) | (26.0-30.0) | (16.7-27.3) | (14.8-27.5) |
| Philippines                             | 7.3         | 7.8          | 6.9         | 7.7         | 7.2         | 7.3         | 10.5        | 11.5        |
|                                         | (5.6-9.1)   | (5.5-10.2)   | (4.9-8.9)   | (6.0-9.4)   | (5.0-9.4)   | (5.5-9.0)   | (5.4-15.5)  | (7.1-16.0)  |
| Samoa                                   | 12.2        | 10.9         | 13.5        | 10.5        | 12.7        | 13.3        | 9.3         | 7.1         |
|                                         | (10.5-13.8) | (7.9-13.9)   | (10.6-16.4) | (7.3-13.7)  | (10.4-15.0) | (10.6-16.0) | (3.9-14.8)  | (0.0-15.9)  |
| Solomon Islands                         | 16.2        | 18.4         | 14.5        | 12.7        | 17.6        | 16.5        | 15.4        | 14.4        |
|                                         | (12.0-20.5) | (11.7-25.0)  | (10.6-18.4) | (5.8-19.5)* | (13.9-21.3) | (12.0-20.9) | (8.3-22.5)  | (1.1-27.7)  |
| Tonga                                   | 13.8        | 12.0         | 15.5        | 13.5        | 13.9        | 14.3        | 13.2        | 13.2        |
|                                         | (11.7-15.9) | (9.7-14.4)   | (12.6-18.5) | (9.9-17.1)  | (11.7-16.0) | (12.1-16.5) | (7.9-18.5)  | (6.0-20.3)  |
| Vanuatu                                 | 10.7        | 12.4         | 9.4         | 7.4         | 14.2        | 8.9         | 9.0         | 4.9         |
|                                         | (6.5-14.8)  | (6.7-18.0)   | (5.3-13.5)  | (1.3-13.5)* | (10.2-18.2) | (5.6-12.2)  | (0.5-17.6)  | (3.8-5.9)   |
| Vietnam*                                | 13.1        | 17.0         | 9.5         | -           | 13.0        | 12.6        | 13.4        | 15.9        |
|                                         | (11.3-14.9) | (14.6-19.4)* | (7.4-11.7)  |             | (11.4-14.7) | (10.5-14.7) | (9.7-17.1)  | (9.9-21.8)  |
| Wallis and Futuna                       | 14.4        | 14.0         | 14.7        | 15.5        | 13.9        | 14.7        | 16.7        | 12.4        |

|                          |             |              |             |             |             |             |             |             |
|--------------------------|-------------|--------------|-------------|-------------|-------------|-------------|-------------|-------------|
|                          | (10.7-18.2) | (8.7-19.4)   | (10.4-19.0) | (10.3-20.6) | (9.2-18.6)  | (10.6-18.9) | (6.1-27.2)  | (1.8-22.9)  |
| <b>Pooled estimates</b>  | <b>13.8</b> | <b>16.5</b>  | <b>11.3</b> | <b>13.1</b> | <b>14.2</b> | <b>13.9</b> | <b>12.8</b> | <b>10.7</b> |
|                          | (10.7-16.9) | (12.7-20.4)  | (8.6-13.9)  | (9.8-16.4)  | (11.4-16.9) | (10.7-17.2) | (9.8-15.8)  | (7.7-13.7)  |
| <b>I<sup>2</sup>(%)</b>  | 97.2        | 96.0         | 94.8        | 93.3        | 95.0        | 96.6        | 80.9        | 83.6        |
| <b>Total</b>             |             |              |             |             |             |             |             |             |
| <b>Pooled estimates*</b> | <b>15.2</b> | <b>18.7</b>  | <b>11.7</b> | <b>15.6</b> | <b>15.1</b> | <b>15.6</b> | <b>14.2</b> | <b>12.5</b> |
|                          | (13.7-16.7) | (16.6-20.9)* | (10.8-12.7) | (14.4-16.8) | (13.4-16.8) | (14.0-17.3) | (13.2-15.2) | (10.4-14.6) |
| <b>I<sup>2</sup>(%)</b>  | 32.5        | 48.8         | 0           | 0           | 55.5        | 43.4        | 0           | 25.3        |

\*There was significantly difference between different sex, age, and BMI group ( $P < 0.05$ ).



**Table S5.** Percentage of engaged in active transportation among young adolescents aged 12-15 years walked or rode a bicycle to and from school at least 3 days during the past 7 days.

| Percentage of active transport on 7 days per week (95% CI) |                                   |                                   |                                   |                                   |                                   |                                   |                                   |                                   |
|------------------------------------------------------------|-----------------------------------|-----------------------------------|-----------------------------------|-----------------------------------|-----------------------------------|-----------------------------------|-----------------------------------|-----------------------------------|
|                                                            | Overall                           | Boys, %                           | Girls, %                          | 12-13, %                          | 14-15, %                          | Normal weight, %                  | Overweight, %                     | Obesity, %                        |
| <b>Africa Region</b>                                       |                                   |                                   |                                   |                                   |                                   |                                   |                                   |                                   |
| Algeria*                                                   | 49.5<br>(44.8-54.2)               | 46.2<br>(41.3-51.1)*              | 52.3<br>(47.2-57.5)               | 43.3<br>(37.2-49.5)*              | 54.4<br>(49.8-59.0)               | 49.2<br>(44.8-53.6)               | 49.6<br>(37.6-61.6)               | 50.9<br>(42.7-59.0)               |
| Benin                                                      | 77.5<br>(73.7-81.2)               | 77.4<br>(74.8-80.0)               | 78.4<br>(70.6-86.2)               | 73.5<br>(66.9-80.2)               | 78.7<br>(74.6-82.8)               | 78.3<br>(74.6-82.0)               | 75.1<br>(64.1-86.1)               | 73.1<br>(62.5-83.6)               |
| Mauritania*                                                | 51.2<br>(46.7-55.8)               | 55.1<br>(50.8-59.4)*              | 47.4<br>(39.4-55.4)               | 49.5<br>(44.6-54.4)               | 51.8<br>(46.6-56.9)               | 50.3<br>(45.6-55.1)               | 45.9<br>(28.8-63.0)               | 56.5<br>(35.9-77.2)               |
| Mauritius*                                                 | 34.9<br>(29.6-40.2)               | 37.2<br>(31.0-43.5)               | 32.6<br>(25.4-39.8)               | 29.2<br>(23.8-34.6)               | 38.5<br>(32.3-44.7)*              | 34.4<br>(29.0-39.8)               | 36.3<br>(26.7-45.9)               | 42.0<br>(29.3-54.7)               |
| Mozambique*                                                | 25.0<br>(16.2-33.7)               | 32.5<br>(23.8-41.1)*              | 18.2<br>(9.8-26.6)                | 19.0<br>(10.6-27.3)               | 27.8<br>(17.2-38.5)*              | 26.9<br>(18.9-35.0)               | 19.0<br>(0.0-94.4)                | -                                 |
| Namibia*                                                   | 34.3<br>(30.3-38.4)               | 37.5<br>(33.0-42.0)*              | 32.4<br>(27.7-37.1)               | 32.0<br>(26.0-38.1)               | 35.2<br>(30.8-39.6)               | 35.8<br>(31.9-39.7)               | 32.6<br>(22.7-42.6)               | 32.9<br>(18.9-46.8)               |
| Seychelles                                                 | 29.0<br>(26.6-31.3)               | 28.3<br>(25.0-31.6)               | 29.5<br>(26.3-32.7)               | 26.2<br>(23.0-29.4)               | 31.6<br>(27.8-35.4)               | 31.4<br>(28.4-34.4)               | 34.7<br>(26.9-42.5)               | 24.6<br>(14.2-35.0)               |
| United Republic of Tanzania*                               | 28.5<br>(25.1-32.0)               | 28.0<br>(24.2-31.8)               | 29.0<br>(24.9-33.0)               | 24.2<br>(19.8-28.5)*              | 32.2<br>(29.7-36.5)               | 33.8<br>(30.1-37.4)               | -                                 | 24.6<br>(0.00-100)                |
| <b>Pooled estimates</b>                                    | <b>41.3</b><br><b>(28.5-54.1)</b> | <b>42.8</b><br><b>(27.2-58.5)</b> | <b>39.9</b><br><b>(29.6-50.1)</b> | <b>37.1</b><br><b>(26.3-47.8)</b> | <b>43.9</b><br><b>(31.2-56.6)</b> | <b>42.6</b><br><b>(30.2-55.0)</b> | <b>44.1</b><br><b>(31.6-56.7)</b> | <b>45.3</b><br><b>(31.0-59.6)</b> |
| I <sup>2</sup> (%)                                         | 98.8                              | 99.1                              | 96.6                              | 97.1                              | 98.3                              | 98.6                              | 86.8                              | 87.6                              |
| <b>Region of the Americas</b>                              |                                   |                                   |                                   |                                   |                                   |                                   |                                   |                                   |

|                      |                     |                      |                     |                      |                     |                     |                     |                     |
|----------------------|---------------------|----------------------|---------------------|----------------------|---------------------|---------------------|---------------------|---------------------|
| Antigua and Barbuda* | 34.8<br>(29.4-40.1) | 32.9<br>(27.3-38.4)* | 37.1<br>(30.8-43.5) | 30.8<br>(26.9-34.8)  | 37.0<br>(29.8-44.3) | 38.8<br>(29.3-48.4) | 36.3<br>(0.0-73.6)  | 32.0<br>(2.9-61.0)  |
| Argentina*           | 55.3<br>(52.4-58.1) | 56.3<br>(52.9-59.7)  | 54.2<br>(51.1-57.4) | 53.1<br>(48.1-58.2)  | 56.3<br>(53.5-59.0) | 56.9<br>(53.6-60.3) | 59.2<br>(54.6-63.9) | 57.6<br>(52.6-62.5) |
| Barbados*            | 16.2<br>(13.9-18.5) | 17.8<br>(14.3-21.3)  | 14.5<br>(11.9-17.1) | 18.2<br>(13.5-22.9)  | 15.3<br>(12.8-17.8) | 16.1<br>(13.5-18.7) | 13.1<br>(6.5-19.8)  | 16.5<br>(6.9-26.2)  |
| Belize*              | 49.4<br>(41.9-57.0) | 52.1<br>(45.4-58.8)* | 47.2<br>(38.7-55.7) | 49.8<br>(41.4-58.1)  | 49.2<br>(40.3-58.0) | 49.3<br>(42.4-56.2) | 53.8<br>(40.5-67.1) | 54.5<br>(37.2-71.8) |
| Bolivia              | 46.3<br>(41.5-51.0) | 43.5<br>(38.6-48.4)* | 49.8<br>(44.1-55.6) | 42.8<br>(37.4-48.2)  | 48.0<br>(42.1-53.9) | 46.3<br>(41.1-51.5) | 48.2<br>(40.9-55.5) | 46.8<br>(40.1-53.5) |
| Chile                | 50.3<br>(44.8-55.8) | 47.4<br>(41.0-53.7)  | 52.7<br>(46.3-59.2) | 49.7<br>(45.1-54.2)  | 50.6<br>(42.7-58.5) | 50.2<br>(44.2-56.1) | 44.4<br>(34.8-53.9) | 60.8<br>(48.7-72.9) |
| Bahamas*             | 24.9<br>(19.5-30.3) | 25.1<br>(19.4-30.7)  | 24.5<br>(18.4-30.5) | 22.1<br>(15.6-28.6)  | 27.8<br>(21.2-34.4) | 23.4<br>(18.6-28.3) | 29.4<br>(17.6-41.2) | 32.1<br>(16.7-47.5) |
| Costa Rica*          | 43.3<br>(37.7-48.8) | 43.2<br>(37.0-49.4)  | 43.3<br>(37.1-49.8) | 36.2<br>(30.6-41.7)* | 47.1<br>(41.0-53.1) | 42.8<br>(37.4-48.3) | 48.0<br>(40.3-55.6) | 40.4<br>(30.7-50.2) |
| Curaçao*             | 28.6<br>(24.9-32.3) | 31.1<br>(26.7-35.4)* | 26.9<br>(21.2-30.6) | 24.1<br>(19.7-28.5)  | 30.2<br>(25.7-34.7) | 24.7<br>(20.3-29.0) | 28.3<br>(17.4-39.2) | 44.3<br>(24.0-64.6) |
| El Salvador*         | 44.6<br>(38.3-51.0) | 44.2<br>(35.8-52.6)  | 45.5<br>(39.0-52.0) | 47.8<br>(39.7-55.9)  | 43.3<br>(36.2-50.4) | 44.5<br>(38.0-51.0) | 42.4<br>(29.1-55.7) | 35.7<br>(25.4-46.0) |
| Guatemala            | 39.5<br>(35.4-43.7) | 38.2<br>(33.5-42.9)  | 42.0<br>(36.6-47.4) | 35.3<br>(28.5-42.2)* | 42.5<br>(37.7-47.4) | 42.2<br>(35.9-48.4) | 39.4<br>(29.1-49.6) | 26.8<br>(18.5-35.2) |
| Guyana*              | 30.4<br>(24.9-35.9) | 32.9<br>(26.3-39.6)  | 27.9<br>(22.0-33.7) | 28.6<br>(21.0-36.3)  | 30.9<br>(25.0-36.9) | 30.5<br>(24.9-36.0) | 29.7<br>(20.8-38.6) | 27.2<br>(14.2-40.3) |
| Honduras*            | 46.1<br>(39.3-52.8) | 48.9<br>(41.9-55.9)  | 44.3<br>(35.5-53.0) | 45.8<br>(36.8-54.9)  | 46.7<br>(40.6-52.8) | 44.6<br>(38.2-51.0) | 53.8<br>(42.0-65.5) | 52.1<br>(39.8-64.4) |
| Peru                 | 53.8                | 51.1                 | 56.5                | 48.8                 | 55.4                | 55.5                | 54.2                | 48.1                |

|                                             |                    |                    |                    |                    |                    |                    |                    |                    |
|---------------------------------------------|--------------------|--------------------|--------------------|--------------------|--------------------|--------------------|--------------------|--------------------|
|                                             | (48.5-59.1)        | (45.9-56.3) *      | (49.9-63.1)        | (39.4-58.1)        | (50.4-60.5)        | (49.5-61.4)        | (44.5-63.0)        | (40.8-55.5)        |
| Suriname                                    | 46.1               | 47.0               | 45.6               | 40.6               | 48.7               | 46.6               | 48.7               | 36.3               |
|                                             | (38.4-53.8)        | (39.5-54.4)        | (37.3-53.9)        | (32.7-48.4) *      | (40.8-56.5)        | (38.9-54.3)        | (35.5-61.8)        | (25.9-46.7)        |
| Trinidad and<br>Tobago*                     | 21.7               | 23.0               | 20.5               | 16.4               | 26.1               | 21.4               | 19.3               | 20.3               |
|                                             | (18.1-25.2)        | (19.2-26..8)       | (15.1-25.8)        | (12.7-20.2) *      | (21.5-30.7)        | (18.1-24.7)        | (10.4-28.2)        | (10.0-30.6)        |
| Uruguay*                                    | 56.2               | 57.6               | 55.1               | 57.4               | 55.9               | 56.3               | 52.6               | 60.2               |
|                                             | (50.7-61.8)        | (51.5-63.6)        | (49.0-61.2)        | (50.8-64.0)        | (50.3-61.5)        | (50.3-62.2)        | (43.9-61.4)        | (51.6-68.8)        |
| <b>Pooled estimates</b>                     | <b>40.4</b>        | <b>41.8</b>        | <b>40.4</b>        | <b>37.9</b>        | <b>41.8</b>        | <b>40.5</b>        | <b>41.3</b>        | <b>40.9</b>        |
|                                             | <b>(32.9-47.8)</b> | <b>(35.1-48.4)</b> | <b>(32.4-48.4)</b> | <b>(31.3-44.6)</b> | <b>(33.8-49.7)</b> | <b>(32.8-48.3)</b> | <b>(33.5-49.2)</b> | <b>(33.8-48.0)</b> |
| <b>I<sup>2</sup>(%)</b>                     | 97.8               | 96.0               | 97.4               | 95.7               | 97.6               | 97.6               | 91.7               | 88.3               |
| <b>Eastern<br/>Mediterranean<br/>Region</b> |                    |                    |                    |                    |                    |                    |                    |                    |
| Afghanistan                                 | 55.3               | 60.5               | 50.7               | 49.0               | 57.3               | 58.5               | 53.7               | 48.7               |
|                                             | (47.7-63.0)        | (50.3-70.6) *      | (43.9-57.4)        | (40.9-57.2)        | (49.2-65.5)        | (49.2-67.9)        | (45.5-61.9)        | (37.2-60.1)        |
| Egypt                                       | 49.5               | 45.2               | 53.2               | 51.8               | 46.8               | 51.1               | 41.1               | 47.0               |
|                                             | (42.1-57.0)        | (35.3-55.2) *      | (43.7-62.6)        | (41.9-61.6)        | (36.8-57.9)        | (42.4-59.8)        | (34.9-47.9)        | (36.6-57.4)        |
| Iraq*                                       | 40.1               | 48.0               | 30.8               | 36.1               | 42.4               | 40.6               | 41.6               | 33.5               |
|                                             | (34.7-45.5)        | (42.4-53.6) *      | (22.5-39.2)        | (28.7-43.6)        | (37.0-47.7)        | (35.0-46.3)        | (34.4-48.9)        | (23.5-43.5)        |
| Kuwait*                                     | 16.9               | 19.3               | 14.1               | 16.9               | 17.0               | 17.6               | 14.3               | 13.7               |
|                                             | (10.6-23.2)        | (13.2-25.5) *      | (11.2-17.0)        | (11.4-22.5)        | (10.5-23.5)        | (10.3-24.9)        | (6.4-22.3)         | (5.7-21.7)         |
| Lebanon*                                    | 14.9               | 14.8               | 15.1               | 9.5                | 18.6               | 13.6               | 11.8               | 11.7               |
|                                             | (8.5-21.4)         | (7.9-21.7)         | (8.2-21.9)         | (6.4-12.6) *       | (9.2-28.0)         | (5.3-21.9)         | (4.9-18.7)         | (4.0-19.4)         |
| Morocco*                                    | 56.2               | 56.6               | 56.2               | 57.1               | 55.8               | 55.1               | 57.8               | 60.8               |
|                                             | (52.3-60.1)        | (53.2-60.0)        | (49.4-62.9)        | (52.3-61.8)        | (51.1-60.4)        | (51.1-59.2)        | (52.0-63.6)        | (55.0-66.5)        |
| Oman*                                       | 15.5               | 19.6               | 11.7               | 12.9               | 16.2               | 15.6               | 17.5               | 15.3               |
|                                             | (12.7-18.3)        | (16.6-22.7) *      | (9.3-14.1)         | (9.1-16.7)         | (13.2-19.3)        | (12.6-18.7)        | (9.8-25.1)         | (10.2-20.3)        |



| <b>Region</b>                           |             |              |             |              |             |             |             |             |
|-----------------------------------------|-------------|--------------|-------------|--------------|-------------|-------------|-------------|-------------|
| Brunei                                  | 15.1        | 16.6         | 13.6        | 14.4         | 15.4        | 15.7        | 11.3        | 12.5        |
| Darussalam*                             | (12.8-17.4) | (13.3-19.9)  | (10.7-16.5) | (10.4-18.4)  | (12.5-18.3) | (13.1-18.3) | (7.1-15.6)  | (5.3-19.7)  |
| Cambodia*                               | 59.7        | 59.7         | 60.0        | 57.6         | 60.6        | 59.8        | 61.1        | 57.7        |
|                                         | (53.2-66.2) | (51.5-67.9)  | (53.4-66.6) | (51.7-63.4)  | (53.3-67.9) | (53.1-66.6) | (50.6-71.5) | (40.5-74.8) |
| Kiribati                                | 39.3        | 40.0         | 38.8        | 34.6         | 41.1        | 40.9        | 35.5        | 34.5        |
|                                         | (34.9-43.7) | (35.3-44.7)  | (33.7-43.8) | (30.6-38.7)* | (35.6-46.5) | (35.7-46.2) | (27.3-43.7) | (22.9-46.1) |
| Lao People's<br>Democratic<br>Republic* | 38.8        | 37.6         | 40.7        | 47.8         | 38.0        | 37.9        | 43.0        | 36.9        |
|                                         | (30.9-46.7) | (27.8-47.4)  | (33.5-47.9) | (36.2-59.5)  | (30.4-45.5) | (30.7-45.1) | (31.0-55.1) | (25.4-48.4) |
| Malaysia*                               | 38.5        | 39.4         | 37.7        | 35.9         | 39.8        | 38.9        | 38.9        | 37.5        |
|                                         | (35.3-41.7) | (35.9-42.9)  | (34.2-41.1) | (32.6-39.1)* | (36.1-43.5) | (35.6-42.2) | (34.1-43.8) | (33.1-42.2) |
| Mongolia                                | 69.8        | 65.8         | 73.7        | 69.0         | 70.5        | 70.5        | 70.4        | 61.4        |
|                                         | (65.7-73.9) | (61.9-69.7)* | (68.8-78.5) | (64.5-73.5)  | (65.8-75.2) | (66.4-74.6) | (65.3-75.6) | (52.5-70.2) |
| Philippines                             | 34.1        | 33.1         | 35.1        | 32.6         | 35.0        | 36.3        | 38.4        | 31.9        |
|                                         | (29.9-38.4) | (28.9-37.3)  | (30.2-40.0) | (27.3-37.8)  | (30.4-39.5) | (32.4-40.3) | (31.0-45.7) | (21.3-42.6) |
| Samoa                                   | 34.9        | 34.9         | 33.6        | 33.9         | 35.0        | 32.5        | 29.2        | 34.7        |
|                                         | (32.5-37.2) | (30.3-39.5)  | (31.0-36.3) | (28.5-39.4)  | (31.8-38.3) | (29.5-35.4) | (19.9-38.5) | (24.9-44.6) |
| Solomon Islands                         | 33.2        | 32.1         | 34.4        | 31.3         | 33.0        | 32.4        | 41.6        | 47.2        |
|                                         | (24.0-42.3) | (21.9-42.4)  | (23.5-45.3) | (21.6-41.1)  | (23.7-43.8) | (20.6-44.2) | (21.1-62.0) | (27.4-67.1) |
| Tonga                                   | 38.7        | 40.6         | 37.1        | 39.4         | 38.7        | 39.1        | 41.7        | 38.9        |
|                                         | (35.5-41.9) | (35.7-45.5)  | (33.3-40.9) | (33.0-45.8)  | (35.5-41.8) | (35.7-42.4) | (33.3-50.2) | (29.1-48.6) |
| Vanuatu                                 | 65.2        | 65.9         | 65.0        | 61.8         | 69.5        | 59.7        | 64.4        | 63.8        |
|                                         | (49.9-80.5) | (50.8-80.9)  | (47.7-82.4) | (42.0-81.6)  | (55.8-83.2) | (41.1-78.3) | (32.1-96.7) | (46.0-81.5) |
| Vietnam*                                | 78.8        | 77.0         | 80.1        | -            | 78.9        | 80.0        | 73.4        | 71.2        |
|                                         | (74.5-82.8) | (72.7-81.4)* | (75.4-84.7) |              | (74.9-82.9) | (76.0-84.0) | (64.7-82.2) | (51.7-90.7) |
| Wallis and Futuna                       | 29.8        | 28.1         | 31.3        | 30.0         | 29.5        | 29.9        | 33.8        | 22.8        |

|                          |             |             |             |             |             |             |             |             |
|--------------------------|-------------|-------------|-------------|-------------|-------------|-------------|-------------|-------------|
|                          | (26.2-33.4) | (23.1-33.1) | (26.3-36.4) | (23.4-36.7) | (24.3-34.6) | (25.2-34.5) | (21.5-46.1) | (10.3-35.4) |
| <b>Pooled estimates</b>  | <b>44.1</b> | <b>43.7</b> | <b>44.4</b> | <b>40.2</b> | <b>44.8</b> | <b>43.9</b> | <b>44.3</b> | <b>41.2</b> |
|                          | (33.9-54.2) | (33.2-54.2) | (33.8-55.1) | (30.8-49.5) | (34.0-55.6) | (33.1-54.8) | (31.8-56.8) | (32.6-49.7) |
| <b>I<sup>2</sup>(%)</b>  | 98.8        | 98.3        | 98.6        | 97.1        | 98.6        | 98.8        | 96.9        | 88.8        |
| <b>Total</b>             |             |             |             |             |             |             |             |             |
| <b>Pooled estimates*</b> | <b>39.5</b> | <b>40.6</b> | <b>38.1</b> | <b>36.8</b> | <b>40.7</b> | <b>39.8</b> | <b>39.6</b> | <b>39.6</b> |
|                          | (34.9-44.0) | (36.2-44.9) | (33.2-43.0) | (32.6-40.9) | (36.0-45.4) | (35.1-44.5) | (34.7-44.4) | (35.2-44.0) |
| <b>I<sup>2</sup>(%)</b>  | 0           | 0           | 14.7        | 0           | 0           | 0           | 0           | 0           |

\*There was significantly difference between different sex, age, and BMI group ( $P<0.05$ ).

**Table S6.** The percentage of at least 5 or more days per week attended physical education classes among young adolescents aged 12-15 years.

| Percentage of physical education classes on 5 or more days per week (95% CI) |                                   |                                   |                                   |                                   |                                   |                                   |                                   |                                   |
|------------------------------------------------------------------------------|-----------------------------------|-----------------------------------|-----------------------------------|-----------------------------------|-----------------------------------|-----------------------------------|-----------------------------------|-----------------------------------|
|                                                                              | Overall                           | Boys, %                           | Girls, %                          | 12-13, %                          | 14-15, %                          | Normal weight, %                  | Overweight, %                     | Obesity, %                        |
| <b>Africa Region</b>                                                         |                                   |                                   |                                   |                                   |                                   |                                   |                                   |                                   |
| Algeria*                                                                     | 16.2<br>(13.2-19.2)               | 17.4<br>(13.4-21.4)               | 15.5<br>(12.8-18.2)               | 17.1<br>(14.0-20.1)               | 15.7<br>(12.2-19.1)               | 16.6<br>(12.9-20.3)               | 15.2<br>(9.3-21.0)                | 16.3<br>(9.5-23.0)                |
| Benin                                                                        | 17.4<br>(13.7-21.1)               | 18.8<br>(14.4-23.1)               | 14.9<br>(10.3-19.5)               | 19.2<br>(12.2-26.2)               | 16.8<br>(13.8-19.9)               | 17.6<br>(14.5-20.7)               | 16.0<br>(8.7-23.3)                | 21.1<br>(16.8-25.4)               |
| Mauritania*                                                                  | 20.5<br>(17.2-23.8)               | 23.9<br>(18.7-29.2)*              | 17.1<br>(12.7-21.4)               | 24.6<br>(17.9-31.3)*              | 19.5<br>(15.9-23.0)               | 21.1<br>(16.2-26.1)               | 21.5<br>(12.0-31.0)               | 18.3<br>(6.3-30.4)                |
| Mauritius*                                                                   | 21.3<br>(18.4-24.2)               | 24.2<br>(21.5-26.8)*              | 18.7<br>(15.8-21.6)               | 21.9<br>(19.6-24.2)               | 20.9<br>(16.8-25.0)               | 20.2<br>(17.5-22.9)               | 23.9<br>(16.7-31.0)               | 29.5<br>(21.2-37.8)               |
| Mozambique*                                                                  | 9.4<br>(4.1-14.6)                 | 11.3<br>(3.0-19.6)*               | 7.2<br>(3.1-11.3)                 | 15.8<br>(1.2-30.4)*               | 7.2<br>(3.7-10.7)                 | 7.9<br>(2.2-13.6)                 | 11.5<br>(0.0-23.2)                | -                                 |
| Namibia*                                                                     | 23.7<br>(20.0-27.3)               | 25.1<br>(19.8-30.3)               | 22.5<br>(19.4-25.6)               | 24.2<br>(18.1-30.2)               | 23.4<br>(19.1-27.7)               | 22.9<br>(19.4-26.4)               | 25.3<br>(18.4-32.2)               | 27.3<br>(15.5-39.1)               |
| Seychelles                                                                   | 25.8<br>(23.2-28.4)               | 24.0<br>(20.7-27.3)*              | 27.3<br>(24.2-30.4)               | 27.3<br>(23.5-31.1)               | 24.3<br>(20.8-27.9)               | 26.1<br>(23.3-28.9)               | 29.2<br>(20.6-37.8)               | 26.7<br>(16.9-36.6)               |
| United Republic of Tanzania*                                                 | 24.8<br>(19.8-29.7)               | 28.2<br>(21.1-35.4)*              | 21.8<br>(17.3-26.2)               | 22.3<br>(18.6-26.1)               | 26.9<br>(20.5-33.3)               | 28.4<br>(22.1-34.6)               | -                                 | 30.7<br>(0.0-100.0)               |
| <b>Pooled estimates</b>                                                      | <b>20.1</b><br><b>(16.8-23.3)</b> | <b>21.9</b><br><b>(19.1-24.8)</b> | <b>18.2</b><br><b>(14.1-22.3)</b> | <b>22.0</b><br><b>(19.3-24.7)</b> | <b>19.1</b><br><b>(15.0-23.3)</b> | <b>20.2</b><br><b>(16.6-23.7)</b> | <b>20.6</b><br><b>(16.1-25.0)</b> | <b>22.5</b><br><b>(18.6-26.3)</b> |
| <b>I<sup>2</sup>(%)</b>                                                      | 85.9                              | 68.2                              | 90.8                              | 64.5                              | 89.6                              | 85.9                              | 56.0                              | 26.6                              |
| <b>Region of the Americas</b>                                                |                                   |                                   |                                   |                                   |                                   |                                   |                                   |                                   |

|                      |                     |                      |                     |                      |                     |                     |                     |                     |
|----------------------|---------------------|----------------------|---------------------|----------------------|---------------------|---------------------|---------------------|---------------------|
| Antigua and Barbuda* | 21.2<br>(17.3-25.2) | 21.6<br>(16.6-26.5)  | 20.6<br>(15.9-25.2) | 24.9<br>(20.1-29.6)* | 19.3<br>(14.6-24.0) | 19.6<br>(13.0-26.2) | -                   | 14.8<br>(0.0-39.2)  |
| Argentina*           | 20.4<br>(18.7-22.2) | 23.0<br>(20.0-26.0)* | 18.0<br>(16.7-19.2) | 20.3<br>(17.8-22.8)  | 20.4<br>(18.4-22.4) | 18.3<br>(16.7-19.9) | 17.7<br>(14.2-21.3) | 21.3<br>(12.6-30.0) |
| Barbados*            | 29.4<br>(26.4-32.5) | 31.8<br>(27.6-36.0)  | 27.0<br>(23.3-30.7) | 33.8<br>(29.3-38.3)* | 27.9<br>(24.6-31.3) | 31.2<br>(27.6-34.8) | 28.2<br>(19.1-37.3) | 18.7<br>(7.7-29.7)  |
| Belize*              | 13.3<br>(10.4-16.2) | 15.5<br>(11.0-20.1)* | 11.3<br>(9.1-13.6)  | 13.9<br>(10.0-17.7)  | 12.8<br>(10.0-15.7) | 12.9<br>(9.9-15.9)  | 13.6<br>(5.7-21.6)  | 11.2<br>(1.3-21.1)  |
| Bolivia              | 26.9<br>(24.6-29.2) | 28.3<br>(25.4-31.3)  | 25.1<br>(21.8-28.4) | 28.3<br>(23.7-32.9)  | 25.6<br>(22.4-28.8) | 26.8<br>(24.1-29.5) | 22.2<br>(16.8-27.6) | 24.6<br>(19.1-30.2) |
| Chile                | 28.3<br>(24.0-32.6) | 26.6<br>(22.6-30.6)  | 29.6<br>(23.7-35.5) | 25.5<br>(22.4-28.6)  | 30.0<br>(24.4-35.7) | 28.4<br>(23.2-33.6) | 33.3<br>(25.0-41.5) | 15.8<br>(7.6-24.0)  |
| Bahamas*             | 14.8<br>(11.6-18.0) | 17.6<br>(11.9-23.3)  | 12.5<br>(9.4-15.6)  | 16.7<br>(13.8-19.6)  | 12.7<br>(7.9-17.6)  | 13.9<br>(9.7-18.0)  | 18.7<br>(14.0-23.4) | 14.5<br>(3.3-25.7)  |
| Costa Rica*          | 31.5<br>(28.5-34.4) | 32.4<br>(29.2-35.6)  | 30.7<br>(26.9-34.5) | 34.4<br>(29.2-39.6)* | 29.9<br>(27.0-32.7) | 31.5<br>(28.9-34.1) | 33.6<br>(26.3-40.9) | 28.5<br>(18.1-39.0) |
| Curaçao*             | 27.7<br>(23.9-31.5) | 30.3<br>(25.3-35.3)  | 25.4<br>(21.1-29.7) | 25.9<br>(20.7-31.1)  | 28.6<br>(24.7-32.4) | 28.1<br>(23.8-32.4) | 28.2<br>(16.8-39.7) | 32.1<br>(14.8-49.4) |
| El Salvador*         | 33.7<br>(30.9-36.4) | 34.6<br>(30.1-39.0)  | 32.3<br>(28.8-35.9) | 33.4<br>(28.8-38.0)  | 33.8<br>(30.1-37.5) | 32.3<br>(29.0-35.6) | 34.2<br>(25.0-43.4) | 43.4<br>(30.8-55.9) |
| Guatemala            | 28.5<br>(22.3-34.7) | 28.2<br>(21.3-35.1)  | 29.5<br>(22.6-36.4) | 29.9<br>(24.5-35.4)  | 28.3<br>(21.4-35.2) | 30.4<br>(23.2-37.7) | 32.4<br>(15.4-49.5) | 28.1<br>(18.4-37.9) |
| Guyana*              | 11.9<br>(9.4-14.4)  | 12.3<br>(9.3-15.4)   | 11.4<br>(8.8-13.9)  | 14.4<br>(11.3-17.4)* | 10.9<br>(8.3-13.5)  | 11.9<br>(9.5-14.3)  | 13.1<br>(6.5-19.6)  | 9.0<br>(0.6-17.4)   |
| Honduras*            | 27.9<br>(24.5-31.3) | 30.0<br>(25.8-34.2)  | 25.8<br>(21.5-30.1) | 32.6<br>(27.2-38.0)* | 23.5<br>(19.9-27.1) | 28.3<br>(24.1-32.5) | 24.3<br>(16.5-32.1) | 27.6<br>(20.4-34.9) |
| Peru                 | 1.7                 | 1.7                  | 1.6                 | 1.5                  | 1.7                 | 1.6                 | 0.8                 | 1.5                 |



|                                             |                    |                    |                    |                    |                    |                    |                    |                    |
|---------------------------------------------|--------------------|--------------------|--------------------|--------------------|--------------------|--------------------|--------------------|--------------------|
|                                             | (0.0-3.4)          | (0.0-3.7)          | (0.0-3.4)          | (0.0-3.0)          | (0.0-3.8)          | (0.0-3.4)          | (0.0-2.0)          | (0.0-3.5)          |
| Suriname                                    | 16.1               | 17.7               | 14.7               | 17.1               | 15.5               | 15.8               | 13.3               | 24.2               |
|                                             | (13.8-18.4)        | (15.1-20.3)        | (11.1-18.3)        | (14.1-20.1)        | (12.5-18.4)        | (13.3-18.4)        | (7.9-18.8)         | (14.8-33.6)        |
| Trinidad and<br>Tobago*                     | 21.3               | 21.5               | 21.2               | 21.2               | 21.5               | 20.7               | 20.5               | 32.9               |
|                                             | (19.2-23.4)        | (17.4-25.6)        | (18.5-23.9)        | (17.6-24.9)        | (17.9-25.1)        | (18.2-23.3)        | (16.1-24.9)        | (21.7-44.2)        |
| Uruguay*                                    | 27.1               | 27.0               | 27.3               | 29.3               | 26.3               | 26.6               | 26.1               | 36.7               |
|                                             | (25.0-29.1)        | (23.9-30.1)        | (25.0-29.5)        | (26.1-32.5)        | (23.8-28.8)        | (24.1-29.1)        | (20.0-32.3)        | (29.2-44.1)        |
| <b>Pooled estimates</b>                     | <b>22.4</b>        | <b>23.5</b>        | <b>21.3</b>        | <b>23.6</b>        | <b>21.6</b>        | <b>22.2</b>        | <b>22.1</b>        | <b>22.5</b>        |
|                                             | <b>(17.7-27.1)</b> | <b>(18.1-28.9)</b> | <b>(16.8-25.7)</b> | <b>(18.0-29.2)</b> | <b>(16.8-26.4)</b> | <b>(17.3-27.0)</b> | <b>(15.1-29.2)</b> | <b>(14.8-30.1)</b> |
| <b>I<sup>2</sup>(%)</b>                     | 98.1               | 97.5               | 97.7               | 97.9               | 97.5               | 98.0               | 97.0               | 94.4               |
| <b>Eastern<br/>Mediterranean<br/>Region</b> |                    |                    |                    |                    |                    |                    |                    |                    |
| Afghanistan                                 | 18.0               | 16.2               | 21.4               | 21.6               | 17.0               | 20.4               | 15.3               | 34.5               |
|                                             | (13.2-22.7)        | (9.2-23.2)         | (14.8-27.9)        | (12.9-30.3)        | (11.9-22.1)        | (15.5-25.4)        | (4.8-25.8)         | (20.0-48.9)        |
| Egypt                                       | 13.3               | 14.8               | 12.0               | 14.3               | 12.7               | 13.5               | 10.3               | 17.9               |
|                                             | (8.9-17.8)         | (9.1-20.6)         | (5.8-18.2)         | (6.6-22.0)         | (8.9-16.6)         | (7.7-19.3)         | (3.6-17.0)         | (10.1-25.6)        |
| Iraq*                                       | 25.4               | 30.6               | 19.2               | 29.0               | 23.3               | 26.2               | 24.8               | 21.7               |
|                                             | (22.9-28.0)        | (28.3-32.9)*       | (15.6-22.7)        | (25.6-32.3)*       | (19.6-26.9)        | (23.2-29.2)        | (16.8-32.8)        | (11.4-32.0)        |
| Kuwait*                                     | 8.0                | 8.6                | 7.5                | 7.9                | 8.1                | 8.6                | 5.0                | 3.2                |
|                                             | (4.6-11.4)         | (3.9-13.2)         | (4.6-10.3)         | (4.3-11.4)         | (4.2-11.9)         | (4.6-12.6)         | (0.5-9.5)          | (0.0-6.4)          |
| Lebanon*                                    | 29.0               | 30.9               | 27.4               | 30.5               | 28.2               | 29.3               | 32.8               | 34.1               |
|                                             | (25.2-32.8)        | (26.9-35.0)        | (22.1-32.8)        | (26.6-34.4)        | (22.5-33.8)        | (25.4-33.2)        | (24.5-41.0)        | (18.5-49.6)        |
| Morocco*                                    | 26.9               | 27.1               | 26.8               | 27.3               | 26.6               | 26.1               | 33.3               | 27.0               |
|                                             | (23.9-30.0)        | (22.9-31.3)        | (23.7-30.0)        | (22.0-32.5)        | (23.6-29.6)        | (24.1-28.1)        | (23.3-43.3)        | (19.5-34.5)        |
| Oman*                                       | 42.7               | 43.4               | 42.3               | 44.6               | 42.2               | 44.0               | 41.0               | 37.4               |
|                                             | (39.4-46.1)        | (40.3-46.4)        | (39.4-45.2)        | (39.5-49.6)        | (38.7-45.7)        | (40.4-47.5)        | (32.7-49.2)        | (29.5-45.4)        |



| <b>Region</b>                           |             |              |             |              |             |             |             |             |
|-----------------------------------------|-------------|--------------|-------------|--------------|-------------|-------------|-------------|-------------|
| Brunei                                  | 20.1        | 21.5         | 18.8        | 23.4         | 18.6        | 20.1        | 20.7        | 23.0        |
| Darussalam*                             | (17.7-22.4) | (18.2-24.9)* | (15.6-22.0) | (20.1-26.8)* | (15.7-21.4) | (17.5-22.6) | (14.2-27.2) | (15.8-30.2) |
| Cambodia*                               | 6.2         | 7.9          | 4.4         | 6.7          | 5.8         | 6.1         | 6.6         | 3.6         |
|                                         | (4.2-8.1)   | (5.3-10.4)*  | (1.7-7.2)   | (3.1-10.3)   | (4.1-7.6)   | (3.6-8.7)   | (2.1-11.1)  | (1.3-5.9)   |
| Kiribati                                | 24.7        | 25.1         | 24.4        | 27.9         | 23.1        | 24.9        | 23.7        | 14.8        |
|                                         | (21.2-28.1) | (19.9-30.2)  | (20.7-28.1) | (25.7-30.2)* | (18.9-27.3) | (20.6-29.2) | (16.3-31.2) | (3.9-25.8)  |
| Lao People's<br>Democratic<br>Republic* | 9.6         | 11.0         | 8.1         | 9.4          | 9.5         | 9.3         | 12.3        | 8.4         |
|                                         | (6.9-12.3)  | (7.0-14.9)   | (4.8-11.4)  | (5.8-13.0)   | (6.5-12.5)  | (6.3-12.4)  | (6.2-18.5)  | (3.5-13.4)  |
| Malaysia*                               | 21.0        | 23.4         | 18.7        | 23.6         | 19.7        | 20.9        | 21.6        | 21.8        |
|                                         | (19.8-22.3) | (22.0-24.7)* | (17.1-20.3) | (21.8-25.3)* | (18.3-21.2) | (19.7-22.2) | (19.3-24.0) | (17.9-25.7) |
| Mongolia                                | 3.7         | 4.2          | 3.2         | 4.0          | 3.5         | 3.6         | 4.5         | 2.6         |
|                                         | (2.9-4.5)   | (3.1-5.3)    | (2.3-4.0)   | (2.8-5.2)    | (2.7-4.3)   | (2.7-4.6)   | (2.4-6.6)   | (0.7-4.5)   |
| Philippines                             | 34.1        | 32.9         | 35.2        | 36.5         | 32.8        | 36.7        | 32.3        | 27.1        |
|                                         | (30.8-37.4) | (29.5-36.4)  | (31.3-39.2) | (32.7-40.3)  | (29.2-36.5) | (33.7-39.6) | (26.9-37.8) | (18.7-35.4) |
| Samoa                                   | 14.7        | 12.2         | 17.2        | 12.8         | 15.4        | 15.5        | 14.3        | 16.0        |
|                                         | (11.3-18.0) | (8.8-15.5)*  | (13.3-21.1) | (9.4-16.1)*  | (11.6-19.1) | (12.7-18.4) | (8.8-19.8)  | (9.0-23.0)  |
| Solomon Islands                         | 28.3        | 25.7         | 28.3        | 23.1         | 29.2        | 26.4        | 35.2        | 30.0        |
|                                         | (22.2-34.4) | (18.3-33.0)  | (21.9-34.7) | (14.8-31.4)* | (23.3-35.1) | (18.7-34.1) | (24.1-46.3) | (20.2-39.7) |
| Tonga                                   | 16.8        | 16.7         | 17.0        | 16.8         | 16.8        | 17.3        | 15.3        | 12.1        |
|                                         | (14.9-18.8) | (14.0-19.5)  | (14.5-19.6) | (12.7-20.9)  | (14.6-19.1) | (14.9-19.7) | (9.0-21.6)  | (5.2-18.9)  |
| Vanuatu                                 | 15.5        | 16.5         | 15.1        | 13.5         | 17.0        | 15.5        | 16.3        | 5.9         |
|                                         | (8.6-22.4)  | (5.4-27.6)   | (10.5-19.7) | (7.9-19.0)   | (9.4-24.6)  | (10.4-20.6) | (0.0-38.8)  | (0.0-18.9)  |
| Vietnam*                                | 3.3         | 2.8          | 3.8         | -            | 3.4         | 3.3         | 1.7         | 4.2         |
|                                         | (1.8-4.8)   | (1.2-4.3)    | (1.8-5.8)   |              | (1.9-4.9)   | (1.9-4.6)   | (0.0-4.2)   | (0.0-9.5)   |
| Wallis and Futuna                       | 6.9         | 8.7          | 5.3         | 7.3          | 6.7         | 7.1         | 8.4         | 4.7         |

|                          |             |             |             |             |             |             |             |             |
|--------------------------|-------------|-------------|-------------|-------------|-------------|-------------|-------------|-------------|
|                          | (4.4-9.5)   | (4.1-13.4)  | (2.5-8.2)   | (3.0-11.6)  | (3.8-9.7)   | (4.3-9.8)   | (0.6-16.1)  | (0.0-12.4)  |
| <b>Pooled estimates</b>  | <b>15.5</b> | <b>16.1</b> | <b>14.8</b> | <b>16.5</b> | <b>15.3</b> | <b>15.5</b> | <b>15.7</b> | <b>14.2</b> |
|                          | (11.6-19.4) | (11.7-20.5) | (11.1-18.6) | (11.9-21.1) | (11.5-19.1) | (11.4-19.5) | (11.2-20.2) | (9.7-18.8)  |
| <b>I<sup>2</sup>(%)</b>  | 98.7        | 98.3        | 98.3        | 98.3        | 98.3        | 98.7        | 94.9        | 93.4        |
| <b>Total</b>             |             |             |             |             |             |             |             |             |
| <b>Pooled estimates*</b> | <b>18.8</b> | <b>20.2</b> | <b>17.5</b> | <b>19.6</b> | <b>18.2</b> | <b>18.7</b> | <b>18.4</b> | <b>19.4</b> |
|                          | (16.1-21.5) | (17.3-23.2) | (14.8-20.2) | (16.2-22.9) | (15.7-20.7) | (15.8-21.6) | (15.6-21.1) | (15.5-23.3) |
| <b>I<sup>2</sup>(%)</b>  | 43.3        | 45.0        | 33.9        | 61.8        | 24.4        | 47.0        | 19.4        | 51.0        |

\*There was significantly difference between different sex, age, and BMI group ( $P < 0.05$ ).

**Table S7.** The percentage of spent 3 or more hours per day in had no sedentary behavior outside school among young adolescents aged 12-15 years. SB Q52new

|                               | Percentage of 3 or more hours per day in sedentary behavior (95% CI) |                                   |                                   |                                   |                                   |                                   |                                   |                                   |
|-------------------------------|----------------------------------------------------------------------|-----------------------------------|-----------------------------------|-----------------------------------|-----------------------------------|-----------------------------------|-----------------------------------|-----------------------------------|
|                               | Overall                                                              | Boys, %                           | Girls, %                          | 12-13, %                          | 14-15, %                          | Normal weight, %                  | Overweight, %                     | Obesity, %                        |
| <b>Africa Region</b>          |                                                                      |                                   |                                   |                                   |                                   |                                   |                                   |                                   |
| Algeria*                      | 26.7<br>(24.3-29.0)                                                  | 29.6<br>(27.1-32.2)*              | 24.1<br>(20.9-27.4)               | 21.5<br>(18.5-24.5)*              | 31.0<br>(27.7-34.4)               | 26.1<br>(23.4-28.9)               | 31.6<br>(26.0-37.2)               | 32.3<br>(24.0-40.6)               |
| Benin                         | 18.5<br>(15.2-21.8)                                                  | 20.2<br>(16.4-23.9)*              | 15.8<br>(11.3-20.3)               | 19.4<br>(14.3-24.5)               | 18.2<br>(15.1-21.3)               | 19.2<br>(15.9-22.6)               | 15.0<br>(6.9-23.2)                | 22.6<br>(12.8-32.5)               |
| Mauritania*                   | 39.1<br>(32.9-45.3)                                                  | 38.9<br>(31.7-46.2)               | 39.4<br>(31.6-47.2)               | 37.3<br>(29.1-45.5)               | 39.6<br>(32.0-47.3)               | 40.4<br>(33.0-47.7)               | 41.6<br>(33.2-50.0)               | 39.1<br>(13.3-65.0)               |
| Mauritius*                    | 39.1<br>(35.4-42.8)                                                  | 37.8<br>(33.7-41.9)               | 40.3<br>(35.6-45.0)               | 28.1<br>(22.9-33.3)*              | 46.1<br>(42.8-49.4)               | 39.3<br>(35.4-43.2)               | 36.6<br>(31.5-41.6)               | 40.9<br>(29.6-52.1)               |
| Mozambique*                   | 41.2<br>(31.8-50.6)                                                  | 34.4<br>(26.5-42.4)*              | 48.4<br>(37.2-59.7)               | 39.6<br>(34.2-45.0)               | 41.6<br>(32.0-51.1)               | 48.8<br>(37.4-60.2)               | 44.5<br>(0.0-94.0)                | -                                 |
| Namibia*                      | 36.9<br>(34.2-39.6)                                                  | 35.0<br>(31.3-38.7)               | 38.1<br>(35.6-40.7)               | 36.2<br>(30.0-42.5)               | 37.3<br>(33.9-40.6)               | 37.0<br>(34.6-39.4)               | 38.2<br>(31.9-44.6)               | 46.0<br>(33.9-58.1)               |
| Seychelles                    | 49.2<br>(46.3-52.0)                                                  | 45.2<br>(41.3-49.0)*              | 52.7<br>(49.2-56.3)               | 44.4<br>(39.7-49.1)*              | 53.8<br>(50.4-57.1)               | 48.4<br>(45.0-51.8)               | 51.9<br>(43.8-60.1)               | 50.5<br>(40.8-60.1)               |
| United Republic of Tanzania*  | 19.7<br>(16.7-22.8)                                                  | 19.4<br>(15.4-23.4)               | 20.0<br>(16.7-23.4)               | 19.1<br>(15.8-22.4)               | 20.2<br>(16.0-24.4)               | 21.6<br>(12.9-30.3)               | -                                 | 12.2<br>(0.0-44.1)                |
| <b>Pooled estimates</b>       | <b>33.6</b><br><b>(25.6-41.7)</b>                                    | <b>32.4</b><br><b>(26.1-38.8)</b> | <b>34.6</b><br><b>(25.3-43.8)</b> | <b>30.5</b><br><b>(23.4-37.6)</b> | <b>35.9</b><br><b>(26.3-45.5)</b> | <b>34.9</b><br><b>(27.3-42.4)</b> | <b>36.0</b><br><b>(28.0-44.0)</b> | <b>35.8</b><br><b>(26.5-45.1)</b> |
| I <sup>2</sup> (%)            | 97.8                                                                 | 94.9                              | 97.6                              | 94.7                              | 97.9                              | 96.6                              | 86.6                              | 75.4                              |
| <b>Region of the Americas</b> |                                                                      |                                   |                                   |                                   |                                   |                                   |                                   |                                   |

|                      |                     |                      |                     |                      |                     |                     |                      |                     |
|----------------------|---------------------|----------------------|---------------------|----------------------|---------------------|---------------------|----------------------|---------------------|
| Antigua and Barbuda* | 54.4<br>(50.6-58.3) | 50.1<br>(45.2-55.0)* | 59.0<br>(53.7-64.2) | 50.2<br>(45.2-55.1)  | 56.8<br>(52.4-61.2) | 65.2<br>(56.8-73.6) | 70.2<br>(31.2-100.0) | 28.0<br>(9.4-46.6)  |
| Argentina*           | 49.9<br>(48.3-51.5) | 46.5<br>(43.6-49.4)* | 53.0<br>(50.9-55.1) | 45.1<br>(42.3-48.0)* | 52.2<br>(50.7-53.7) | 51.8<br>(50.0-53.7) | 49.5<br>(45.5-53.6)  | 48.4<br>(39.7-57.2) |
| Barbados*            | 65.2<br>(62.1-68.3) | 60.7<br>(56.1-65.3)* | 69.7<br>(66.0-73.4) | 58.0<br>(53.5-62.6)* | 67.6<br>(64.5-70.7) | 64.4<br>(60.8-68.1) | 66.9<br>(57.7-76.2)  | 73.8<br>(63.8-83.8) |
| Belize*              | 36.7<br>(32.5-40.9) | 33.0<br>(28.1-37.8)* | 40.4<br>(35.4-45.3) | 36.3<br>(33.0-39.6)  | 37.3<br>(30.8-43.8) | 37.1<br>(32.7-41.5) | 36.1<br>(24.8-47.3)  | 42.4<br>(33.0-51.8) |
| Bolivia              | 24.5<br>(21.5-27.4) | 24.9<br>(21.2-28.7)  | 24.6<br>(20.7-28.4) | 23.5<br>(18.6-28.4)  | 25.0<br>(21.8-28.1) | 24.8<br>(21.5-28.1) | 24.3<br>(16.5-32.0)  | 28.9<br>(22.2-35.6) |
| Chile                | 52.6<br>(48.2-56.9) | 50.5<br>(44.0-57.1)  | 54.7<br>(50.0-59.4) | 51.0<br>(45.9-56.2)  | 53.6<br>(48.0-59.2) | 53.8<br>(48.3-59.2) | 55.0<br>(47.1-63.0)  | 36.8<br>(25.8-47.8) |
| Bahamas*             | 54.9<br>(51.4-58.4) | 49.8<br>(45.8-53.8)* | 59.4<br>(54.9-63.8) | 52.9<br>(48.5-57.2)  | 57.2<br>(52.6-61.7) | 56.8<br>(53.4-60.2) | 49.3<br>(37.7-60.9)  | 49.5<br>(38.8-60.1) |
| Costa Rica*          | 44.0<br>(40.5-47.6) | 40.3<br>(36.5-44.0)* | 47.6<br>(43.0-52.2) | 39.9<br>(35.3-44.5)* | 46.2<br>(42.5-49.9) | 42.8<br>(38.7-46.8) | 50.8<br>(41.0-60.5)  | 48.5<br>(42.2-54.7) |
| Curaçao*             | 58.6<br>(55.4-61.8) | 58.3<br>(54.3-62.3)  | 58.8<br>(54.6-62.9) | 51.3<br>(46.3-56.2)* | 62.0<br>(58.4-65.6) | 57.3<br>(52.3-62.3) | 65.3<br>(54.7-75.9)  | 65.0<br>(47.2-82.8) |
| El Salvador*         | 35.0<br>(30.1-40.0) | 33.1<br>(27.5-38.6)* | 37.5<br>(31.1-43.8) | 25.7<br>(19.2-32.2)* | 39.5<br>(34.7-44.2) | 35.4<br>(29.5-41.2) | 36.6<br>(28.4-44.9)  | 47.3<br>(40.6-53.9) |
| Guatemala            | 22.8<br>(16.9-28.7) | 21.2<br>(14.6-27.9)  | 24.8<br>(19.0-30.6) | 19.6<br>(13.1-26.1)  | 24.9<br>(18.2-31.7) | 22.0<br>(16.0-28.0) | 22.9<br>(16.6-29.3)  | 26.7<br>(19.1-34.3) |
| Guyana*              | 35.7<br>(30.2-41.1) | 35.4<br>(30.0-40.8)  | 35.8<br>(29.3-42.3) | 32.4<br>(24.5-40.4)  | 37.0<br>(31.3-42.8) | 34.6<br>(29.4-39.9) | 39.9<br>(29.5-50.3)  | 38.5<br>(30.4-46.7) |
| Honduras*            | 30.3<br>(27.7-32.8) | 30.0<br>(26.9-33.1)  | 30.7<br>(26.9-34.5) | 29.7<br>(26.4-33.1)  | 30.8<br>(27.6-34.1) | 30.1<br>(27.4-32.7) | 34.3<br>(29.3-39.4)  | 36.4<br>(25.0-47.8) |
| Peru                 | 28.8                | 28.3                 | 29.4                | 25.7                 | 29.8                | 29.0                | 29.4                 | 32.5                |

|                                             |                    |                    |                    |                    |                    |                    |                    |                    |
|---------------------------------------------|--------------------|--------------------|--------------------|--------------------|--------------------|--------------------|--------------------|--------------------|
|                                             | (25.2-32.4)        | (24.8-31.8)        | (24.1-34.8)        | (20.8-30.7)        | (26.0-33.6)        | (25.3-32.7)        | (21.6-37.3)        | (21.5-43.6)        |
| Suriname                                    | 40.7               | 40.4               | 40.8               | 33.5               | 44.3               | 41.1               | 39.1               | 39.7               |
|                                             | (35.8-45.6)        | (34.1-46.8)        | (36.2-45.5)        | (26.8-40.1)*       | (38.1-50.6)        | (36.0-46.2)        | (32.1-46.2)        | (20.1-59.4)        |
| Trinidad and<br>Tobago*                     | 44.2               | 39.9               | 48.2               | 36.4               | 50.4               | 44.4               | 49.0               | 44.5               |
|                                             | (40.7-47.7)        | (32.9-46.8)*       | (45.1-51.3)        | (33.1-39.7)*       | (44.6-56.3)        | (39.7-49.1)        | (40.4-57.6)        | (33.7-55.4)        |
| Uruguay*                                    | 58.3               | 56.5               | 60.0               | 53.9               | 59.9               | 59.2               | 60.7               | 53.3               |
|                                             | (55.1-61.4)        | (52.7-60.4)*       | (56.0-64.1)        | (48.1-59.6)*       | (57.1-62.8)        | (55.8-62.7)        | (53.8-67.5)        | (42.8-63.8)        |
| <b>Pooled estimates</b>                     | <b>43.4</b>        | <b>41.1</b>        | <b>45.6</b>        | <b>39.2</b>        | <b>45.6</b>        | <b>44.1</b>        | <b>44.8</b>        | <b>43.5</b>        |
|                                             | <b>(37.3-49.5)</b> | <b>(35.4-46.9)</b> | <b>(39.3-51.9)</b> | <b>(33.9-44.5)</b> | <b>(39.2-52.0)</b> | <b>(37.6-50.5)</b> | <b>(38.3-51.2)</b> | <b>(37.7-49.3)</b> |
| <b>I<sup>2</sup>(%)</b>                     | 98.2               | 96.7               | 97.5               | 95.6               | 98.1               | 97.9               | 91.3               | 83.7               |
| <b>Eastern<br/>Mediterranean<br/>Region</b> |                    |                    |                    |                    |                    |                    |                    |                    |
| Afghanistan                                 | 23.6               | 20.8               | 27.1               | 21.3               | 25.0               | 23.3               | 23.0               | 26.7               |
|                                             | (16.6-30.6)        | (12.4-29.2)*       | (18.7-35.6)        | (15.6-27.0)        | (17.2-32.8)        | (14.8-31.8)        | (9.5-36.6)         | (17.7-35.6)        |
| Egypt                                       | 27.4               | 35.5               | 19.1               | 26.8               | 27.8               | 26.9               | 27.2               | 27.5               |
|                                             | (21.5-33.2)        | (25.5-43.5)*       | (14.0-24.1)        | (20.1-33.5)        | (21.5-34.1)        | (19.8-33.9)        | (19.4-34.9)        | (18.9-36.2)        |
| Iraq*                                       | 26.1               | 27.8               | 24.1               | 25.6               | 26.3               | 25.7               | 30.1               | 34.4               |
|                                             | (22.2-30.0)        | (24.5-31.1)        | (19.7-28.5)        | (19.3-31.9)        | (22.4-30.1)        | (21.6-29.8)        | (19.1-41.2)        | (22.5-46.3)        |
| Kuwait*                                     | 62.8               | 61.3               | 64.3               | 59.8               | 64.3               | 61.4               | 66.8               | 69.3               |
|                                             | (57.0-68.5)        | (54.2-68.3)        | (60.2-68.4)        | (53.8-65.7)        | (57.4-71.1)        | (55.4-67.4)        | (54.9-78.7)        | (62.0-76.6)        |
| Lebanon*                                    | 46.9               | 44.9               | 48.8               | 44.8               | 48.4               | 48.5               | 49.0               | 41.6               |
|                                             | (42.4-51.5)        | (39.0-50.7)        | (44.5-53.1)        | (41.7-48.0)        | (42.5-54.3)        | (43.6-53.5)        | (40.3-57.7)        | (19.0-64.1)        |
| Morocco*                                    | 25.6               | 25.1               | 26.0               | 22.2               | 28.2               | 24.9               | 32.9               | 27.3               |
|                                             | (22.8-28.4)        | (22.1-28.2)        | (22.3-29.8)        | (18.9-25.5)*       | (25.0-31.4)        | (21.5-28.4)        | (24.1-41.7)        | (16.6-38.0)        |
| Oman*                                       | 37.8               | 39.2               | 36.3               | 35.2               | 38.6               | 37.4               | 45.5               | 39.7               |
|                                             | (34.0-41.6)        | (35.4-43.0)        | (32.6-40.1)        | (27.8-42.6)        | (34.5-42.8)        | (33.2-41.6)        | (36.2-54.8)        | (31.8-47.6)        |





| <b>Region</b>                           |             |              |             |              |             |             |             |             |
|-----------------------------------------|-------------|--------------|-------------|--------------|-------------|-------------|-------------|-------------|
| Brunei                                  | 54.6        | 51.0         | 57.8        | 45.4         | 58.7        | 54.7        | 51.9        | 58.7        |
| Darussalam*                             | (51.3-57.8) | (46.5-55.6)  | (53.9-61.7) | (41.1-49.6)* | (54.5-62.8) | (51.6-57.9) | (42.5-61.2) | (47.2-70.2) |
| Cambodia*                               | 10.2        | 11.1         | 9.4         | 9.4          | 10.5        | 10.1        | 11.9        | 11.1        |
|                                         | (7.4-12.9)  | (8.0-14.2)   | (6.1-12.7)  | (6.9-11.9)   | (6.9-14.1)  | (6.6-13.7)  | (7.0-16.7)  | (6.9-15.2)  |
| Kiribati                                | 14.6        | 16.0         | 13.6        | 14.9         | 14.2        | 14.0        | 15.3        | 19.6        |
|                                         | (12.3-17.0) | (11.4-20.5)  | (11.7-15.6) | (11.2-18.6)  | (11.1-17.4) | (11.4-16.6) | (9.7-20.9)  | (7.3-32.0)  |
| Lao People's<br>Democratic<br>Republic* | 19.1        | 19.1         | 19.1        | 20.1         | 19.0        | 18.8        | 17.5        | 28.6        |
|                                         | (16.4-21.8) | (15.9-22.3)  | (15.6-22.7) | (15.6-24.6)  | (16.0-21.9) | (16.2-21.4) | (11.9-23.1) | (15.9-41.2) |
| Malaysia*                               | 42.6        | 41.8         | 43.5        | 35.5         | 46.3        | 43.1        | 43.8        | 40.2        |
|                                         | (40.9-44.4) | (39.5-44.0)  | (41.6-45.5) | (33.4-37.7)* | (44.2-48.5) | (41.2-44.9) | (40.7-46.9) | (36.4-43.9) |
| Mongolia                                | 40.0        | 37.1         | 42.7        | 33.3         | 45.3        | 40.0        | 43.5        | 42.0        |
|                                         | (36.2-43.7) | (33.2-41.0)  | (38.3-47.2) | (28.8-37.8)* | (41.2-49.3) | (36.1-44.0) | (37.1-49.9) | (35.9-48.1) |
| Philippines                             | 30.6        | 30.1         | 31.1        | 28.8         | 31.6        | 30.3        | 38.5        | 40.6        |
|                                         | (26.7-34.4) | (24.7-35.5)  | (26.8-35.4) | (24.6-33.1)  | (27.4-35.8) | (26.2-34.4) | (32.4-44.6) | (34.0-47.1) |
| Samoa                                   | 37.5        | 43.3         | 30.6        | 36.3         | 37.8        | 34.3        | 34.6        | 40.4        |
|                                         | (33.6-41.5) | (38.9-47.7)* | (26.8-34.3) | (30.5-42.1)  | (33.1-42.4) | (29.7-38.9) | (27.5-41.8) | (29.4-51.4) |
| Solomon Islands                         | 26.4        | 26.4         | 27.0        | 30.2         | 24.1        | 24.3        | 25.7        | 31.4        |
|                                         | (20.9-32.0) | (16.8-36.0)  | (21.1-32.9) | (25.4-35.1)* | (18.1-30.1) | (18.5-30.1) | (17.2-34.3) | (22.6-40.1) |
| Tonga                                   | 29.2        | 28.2         | 30.1        | 26.6         | 30.1        | 27.8        | 31.3        | 37.9        |
|                                         | (26.5-32.0) | (24.6-31.8)  | (26.3-33.9) | (20.7-32.5)  | (27.3-32.8) | (24.5-31.0) | (23.8-38.9) | (27.4-48.3) |
| Vanuatu                                 | 19.1        | 22.3         | 16.0        | 16.6         | 22.1        | 18.8        | 28.3        | 16.4        |
|                                         | (14.6-23.6) | (15.4-29.2)  | (10.6-21.4) | (10.7-22.5)* | (16.7-27.5) | (13.9-23.7) | (7.4-49.2)  | (0.0-33.3)  |
| Vietnam*                                | 35.1        | 33.8         | 36.2        | -            | 35.1        | 34.6        | 39.5        | 37.2        |
|                                         | (30.6-39.6) | (29.8-37.7)  | (30.7-41.8) |              | (30.7-39.5) | (29.9-39.4) | (31.7-47.3) | (29.6-44.8) |
| Wallis and Futuna                       | 34.0        | 28.1         | 39.2        | 29.4         | 37.3        | 35.1        | 26.8        | 33.9        |

|                          |             |              |             |              |             |              |             |             |
|--------------------------|-------------|--------------|-------------|--------------|-------------|--------------|-------------|-------------|
|                          | (29.3-38.7) | (22.4-33.9)* | (33.0-45.5) | (22.0-36.8)* | (32.2-42.4) | (29.9-40.4)  | (11.5-42.1) | (21.7-46.2) |
| <b>Pooled estimates</b>  | <b>30.2</b> | <b>29.9</b>  | <b>30.5</b> | <b>27.2</b>  | <b>31.7</b> | <b>29.7</b>  | <b>31.5</b> | <b>33.9</b> |
|                          | (22.6-37.9) | (23.0-36.9)  | (22.0-39.0) | (20.2-34.2)  | (23.8-39.6) | (21.96-37.5) | (23.7-39.3) | (26.0-41.8) |
| <b>I<sup>2</sup>(%)</b>  | 98.7        | 97.4         | 98.7        | 97.3         | 98.4        | 98.5         | 94.6        | 92.8        |
| <b>Total</b>             |             |              |             |              |             |              |             |             |
| <b>Pooled estimates*</b> | <b>34.6</b> | <b>33.6</b>  | <b>35.0</b> | <b>31.3</b>  | <b>36.5</b> | <b>34.8</b>  | <b>36.5</b> | <b>38.0</b> |
|                          | (28.4-40.7) | (28.5-38.7)  | (27.6-42.4) | (25.5-37.0)  | (30.0-43.0) | (28.4-41.2)  | (30.7-42.2) | (33.3-42.7) |
| <b>I<sup>2</sup>(%)</b>  | 60.0        | 53.2         | 67.8        | 62.8         | 58.4        | 62.0         | 53.2        | 22.7        |

\*There was significantly difference between different sex, age, and BMI group ( $P < 0.05$ ).

**Table S8.** The percentage of all four active among young adolescents aged 12-15 years.

|                               | <b>Overall</b>                 | <b>Boys, %</b>                  | <b>Girls, %</b>                | <b>12-13, %</b>                | <b>14-15, %</b>                | <b>Normal weight, %</b>        | <b>Overweight, %</b>           | <b>Obesity, %</b>            |
|-------------------------------|--------------------------------|---------------------------------|--------------------------------|--------------------------------|--------------------------------|--------------------------------|--------------------------------|------------------------------|
| <b>Africa Region</b>          |                                |                                 |                                |                                |                                |                                |                                |                              |
| Algeria*                      | 0.8<br>(0.3-1.2)               | 1.1<br>(0.4-1.8)*               | 0.6<br>(0.1-1.0)               | 0.8<br>(0.3-1.3)               | 0.8<br>(0.3-1.3)               | 0.7<br>(0.3-1.1)               | 1.6<br>(0.0-3.2)               | 0.2<br>(0.2-0.3)             |
| Benin                         | 1.7<br>(0.6-2.6)               | 2.2<br>(1.1-3.3)*               | 0.6<br>(0.0-1.6)               | 2.3<br>(1.0-3.5)               | 1.5<br>(0.4-2.6)               | 1.7<br>(0.8-2.6)               | 0.0<br>(0.0-0.0)               | 5.4<br>(3.3-7.6)             |
| Mauritania*                   | 1.8<br>(0.3-3.3)               | 2.3<br>(0.3-4.4)*               | 1.3<br>(0.1-2.5)               | 1.0<br>(0.0-2.6)               | 2.1<br>(0.3-3.9)               | 1.9<br>(0.1-3.7)               | 0.0<br>(0.0-0.0)               | 4.4<br>(0.0-11.1)            |
| Mauritius*                    | 1.0<br>(0.4-1.6)               | 1.6<br>(0.6-2.6)*               | 0.4<br>(0.1-0.8)               | 0.7<br>(0.0-1.5)               | 1.2<br>(0.5-1.9)               | 0.9<br>(0.3-1.6)               | 1.4<br>(0.0-3.2)               | 2.6<br>(0.0-5.9)             |
| Mozambique*                   | 0.5<br>(0.01-1.1)              | 0.5<br>(0.4-0.7)                | 0.6<br>(0.0-1.7)               | 0.0<br>(0.0-0.0)               | 0.7<br>(0.0-1.5)               | -                              | -                              | -                            |
| Namibia*                      | 1.2<br>(0.6-1.7)               | 1.8<br>(0.8-2.7)*               | 0.7<br>(0.2-1.3)               | 0.6<br>(0.0-1.2)               | 1.4<br>(0.8-2.1)               | 1.2<br>(0.6-1.7)               | 1.2<br>(0.0-3.0)               | 1.9<br>(1.2-2.5)             |
| Seychelles                    | 1.2<br>(0.6-1.8)               | 0.8<br>(0.1-1.6)*               | 1.6<br>(0.8-2.4)               | 1.4<br>(0.6-2.2)               | 1.1<br>(0.2-2.0)               | 1.6<br>(0.8-2.4)               | 0.0<br>(0.0-0.0)               | 0.0<br>(0.0-0.0)             |
| United Republic of Tanzania*  | 1.3<br>(0.8-2.0)               | 1.6<br>(0.6-2.5)                | 1.3<br>(0.5-2.1)               | 1.6<br>(1.0-2.2)               | 1.3<br>(0.5-2.0)               | 1.1<br>(0.0-3.0)               | 0.0<br>(0.0-0.0)               | 0.0<br>(0.0-0.0)             |
| <b>Pooled estimates</b>       | <b>1.0</b><br><b>(0.8-1.3)</b> | <b>1.3</b><br><b>(0.8-1.9)*</b> | <b>0.8</b><br><b>(0.5-1.1)</b> | <b>1.1</b><br><b>(0.7-1.5)</b> | <b>1.1</b><br><b>(0.8-1.4)</b> | <b>1.1</b><br><b>(0.8-1.4)</b> | <b>1.4</b><br><b>(0.5-2.3)</b> | <b>2.4</b><br><b>(0.7-4)</b> |
| I <sup>2</sup> (%)            | 20.7                           | 75.5                            | 36.8                           | 49.0                           | 0                              | 26.0                           | 0                              | 92.5                         |
| <b>Region of the Americas</b> |                                |                                 |                                |                                |                                |                                |                                |                              |

|                      |                  |                   |                  |                  |                  |                  |                  |                   |
|----------------------|------------------|-------------------|------------------|------------------|------------------|------------------|------------------|-------------------|
| Antigua and Barbuda* | 1.9<br>(1.1-2.8) | 2.1<br>(0.9-3.3)* | 1.5<br>(0.5-2.5) | 2.1<br>(1.0-3.1) | 1.9<br>(0.8-3.0) | 1.0<br>(0.0-2.4) | 0.0<br>(0.0-0.0) | 0.0<br>(0.0-0.0)  |
| Argentina*           | 1.4<br>(1.0-1.8) | 1.6<br>(1.2-1.9)  | 1.3<br>(0.7-1.9) | 1.2<br>(0.7-1.8) | 1.5<br>(1.1-1.9) | 1.3<br>(1.0-1.6) | 1.8<br>(1.1-2.5) | 2.1<br>(0.0-4.4)  |
| Barbados*            | 1.0<br>(0.4-1.6) | 1.5<br>(0.4-2.6)* | 0.5<br>(0.0-1.0) | 1.0<br>(0.0-2.2) | 1.0<br>(0.3-1.7) | 1.1<br>(0.4-1.9) | 0.8<br>(0.7-0.9) | 0.0<br>(0.0-0.0)  |
| Belize*              | 0.9<br>(0.5-1.4) | 1.1<br>(0.3-1.8)  | 0.8<br>(0.1-1.5) | 1.1<br>(0.3-1.9) | 0.8<br>(0.3-1.4) | 1.1<br>(0.5-1.8) | 0.6<br>(0.0-1.8) | 0.0<br>(0.0-0.0)  |
| Bolivia              | 0.7<br>(0.4-1.0) | 0.9<br>(0.2-1.6)  | 0.5<br>(0.2-0.8) | 0.5<br>(0.0-1.0) | 0.8<br>(0.4-1.2) | 0.8<br>(0.4-1.2) | 0.0<br>(0.0-0.0) | 1.2<br>(0.0-2.6)  |
| Chile                | 1.6<br>(1.0-2.3) | 2.2<br>(0.8-3.5)* | 1.2<br>(0.3-2.1) | 1.6<br>(0.7-2.5) | 1.7<br>(0.8-2.6) | 1.8<br>(0.9-2.6) | 0.6<br>(0.0-2.0) | 0.0<br>(0.0-0.0)  |
| Bahamas*             | 0.7<br>(0.2-1.3) | 1.3<br>(0.2-2.4)* | 0.3<br>(0.0-0.6) | 0.7<br>(0.0-1.3) | 0.8<br>(0.0-1.6) | 1.0<br>(0.3-1.8) | 0.0<br>(0.0-0.0) | 0.0<br>(0.0-0.0)  |
| Costa Rica*          | 1.7<br>(1.1-2.3) | 1.9<br>(1.3-2.6)  | 1.5<br>(0.6-2.3) | 2.0<br>(1.0-3.0) | 1.5<br>(0.9-2.2) | 1.8<br>(1.1-2.6) | 2.0<br>(0.7-3.3) | 0.9<br>(0.0-2.9)  |
| Curaçao*             | 1.8<br>(1.1-2.6) | 2.4<br>(1.4-3.5)* | 1.3<br>(0.3-2.4) | 1.4<br>(0.4-2.5) | 2.0<br>(1.1-3.0) | 1.7<br>(0.7-2.8) | 1.5<br>(0.0-4.7) | 6.0<br>(0.0-15.1) |
| El Salvador*         | 0.7<br>(0.3-1.2) | 1.0<br>(0.3-1.7)* | 0.5<br>(0.0-1.0) | 0.3<br>(0.0-0.8) | 0.9<br>(0.3-1.5) | 0.9<br>(0.3-1.5) | 0.5<br>(0.0-1.4) | 0.0<br>(0.0-0.0)  |
| Guatemala            | 0.8<br>(0.3-1.2) | 0.5<br>(0.0-1.0)* | 1.1<br>(0.1-2.1) | 0.1<br>(0.0-0.1) | 1.2<br>(0.4-1.9) | 0.8<br>(0.2-1.4) | 1.6<br>(0.0-3.9) | 0.0<br>(0.0-0.2)  |
| Guyana*              | 0.5<br>(0.2-0.8) | 0.9<br>(0.3-1.4)* | 0.2<br>(0.0-0.4) | 0.4<br>(0.0-1.0) | 0.6<br>(0.2-0.9) | 0.5<br>(0.2-0.8) | 0.0<br>(0.0-0.0) | 1.2<br>(0.0-3.8)  |
| Honduras*            | 0.9<br>(0.4-1.5) | 1.1<br>(0.1-2.0)  | 0.8<br>(0.0-1.8) | 1.3<br>(0.4-2.2) | 0.6<br>(0.0-1.3) | 1.1<br>(0.4-1.9) | 0.7<br>(0.0-2.1) | 0.0<br>(0.0-0.0)  |
| Peru                 | 0.1              | 0.0               | 0.1              | 0.0              | 0.1              | 0.0              | 0.0              | 0.0               |

|                                             |                  |                   |                  |                  |                  |                  |                  |                  |
|---------------------------------------------|------------------|-------------------|------------------|------------------|------------------|------------------|------------------|------------------|
|                                             | (0.0-0.2)        | (0.0-0.0)         | (0.0-0.4)        | (0.0-0.0)        | (0.0-0.3)        | (0.0-0.0)        | (0.0-0.0)        | (0.0-0.0)        |
| Suriname                                    | 1.6              | 2.4               | 0.9              | 1.6              | 1.6              | 1.2              | 2.3              | 2.1              |
|                                             | (0.7-2.5)        | (1.0-3.7)*        | (0.0-2.0)        | (0.4-2.8)        | (0.4-2.8)        | (0.1-2.3)        | (0.0-5.7)        | (0.0-7.0)        |
| Trinidad and<br>Tobago*                     | 0.8              | 1.3               | 0.4              | 0.5              | 1.1              | 1.1              | 0.0              | 0.0              |
|                                             | (0.3-1.4)        | (0.5-2.1)*        | (0.0-1.0)        | (0.0-1.1)        | (0.4-1.9)        | (0.5-1.8)        | (0.0-0.0)        | (0.0-0.0)        |
| Uruguay*                                    | 2.4              | 3.2               | 1.7              | 3.1              | 2.1              | 2.4              | 2.4              | 4.7              |
|                                             | (1.6-3.2)        | (1.9-4.4)*        | (1.0-2.3)        | (1.8-4.4)        | (1.2-2.9)        | (1.5-3.3)        | (0.3-4.5)        | (0.6-8.9)        |
| <b>Pooled estimates</b>                     | <b>1.1</b>       | <b>1.4</b>        | <b>0.7</b>       | <b>1.0</b>       | <b>1.1</b>       | <b>1.1</b>       | <b>1.0</b>       | <b>1.2</b>       |
|                                             | <b>(0.8-1.4)</b> | <b>(1.1-1.8)*</b> | <b>(0.5-1.0)</b> | <b>(0.7-1.4)</b> | <b>(0.8-1.5)</b> | <b>(0.9-1.4)</b> | <b>(0.7-1.4)</b> | <b>(0.2-2.2)</b> |
| <b>I<sup>2</sup>(%)</b>                     | 90.5             | 61.8              | 73.1             | 85.9             | 85.7             | 57.2             | 38.5             | 61.7             |
| <b>Eastern<br/>Mediterranean<br/>Region</b> |                  |                   |                  |                  |                  |                  |                  |                  |
| Afghanistan                                 | 0.4              | 0.3               | 0.6              | 0.9              | 0.3              | 0.2              | 0.0              | 3.5              |
|                                             | (0.01-0.9)       | (0.0-0.8)         | (0.0-1.5)        | (0.0-2.1)        | (0.0-0.7)        | (0.0-0.5)        | (0.0-0.0)        | (0.0-7.4)        |
| Egypt                                       | 0.6              | 1.1               | 0.1              | 0.5              | 0.7              | 0.6              | 0.0              | 0.0              |
|                                             | (0.01-1.2)       | (0.1-2.0)*        | (0.0-0.3)        | (0.0-1.4)        | (0.0-1.3)        | (0.0-1.3)        | (0.0-0.0)        | (0.0-0.0)        |
| Iraq*                                       | 1.3              | 1.9               | 0.6              | 1.3              | 1.4              | 1.4              | 1.5              | 1.1              |
|                                             | (0.8-1.9)        | (1.1-2.8)*        | (0.2-1.1)        | (0.1-2.4)        | (0.7-2.1)        | (0.7-2.0)        | (0.0-3.7)        | (0.0-3.5)        |
| Kuwait*                                     | 0.5              | 0.5               | 0.5              | 0.9              | 0.3              | 0.7              | 0.0              | 0.0              |
|                                             | (0.2-0.7)        | (0.0-1.0)         | (0.0-1.2)        | (0.2-1.5)        | (0.0-0.7)        | (0.3-1.0)        | (0.0-0.0)        | (0.0-0.0)        |
| Lebanon*                                    | 0.8              | 1.0               | 0.5              | 1.0              | 0.6              | 1.0              | 0.6              | 0.0              |
|                                             | (0.3-1.2)        | (0.4-1.7)*        | (0.1-0.9)        | (0.3-1.8)        | (0.0-1.1)        | (0.4-1.5)        | (0.0-1.8)        | (0.0-0.0)        |
| Morocco*                                    | 1.5              | 1.4               | 1.7              | 1.3              | 1.8              | 1.7              | 2.4              | 0.0              |
|                                             | (0.9-2.1)        | (0.7-2.1)         | (0.7-2.7)        | (0.2-2.3)        | (1.2-2.3)        | (1.0-2.4)        | (0.7-4.1)        | (0.0-0.0)        |
| Oman*                                       | 0.9              | 1.5               | 0.5              | 1.0              | 1.0              | 0.9              | 1.4              | 1.1              |
|                                             | (0.5-1.4)        | (1.0-1.9)*        | (0.1-1.0)        | (0.5-1.5)        | (0.5-1.4)        | (0.3-1.5)        | (1.3-1.6)        | (0.8-1.3)        |



| <b>Region</b>                           |           |            |           |           |           |           |           |           |
|-----------------------------------------|-----------|------------|-----------|-----------|-----------|-----------|-----------|-----------|
| Brunei                                  | 0.3       | 0.4        | 0.2       | 0.5       | 0.2       | 0.2       | 0.0       | 0.0       |
| Darussalam*                             | (0.0-0.5) | (0.0-0.8)  | (0.0-0.5) | (0.0-1.1) | (0.0-0.4) | (0.0-0.7) | (0.0-0.0) | (0.0-0.0) |
| Cambodia*                               | 0.02      | 0.0        | 0.0       | 0.0       | 0.0       | 0.0       | 0.0       | 0.0       |
|                                         | (0.0-0.1) | (0.0-0.0)  | (0.0-0.1) | (0.0-0.0) | (0.0-0.1) | (0.0-0.1) | (0.0-0.0) | (0.0-0.0) |
| Kiribati                                | 1.4       | 1.9        | 1.0       | 0.5       | 1.6       | 1.4       | 0.8       | 0.0       |
|                                         | (0.8-1.9) | (0.5-3.3)  | (0.2-1.7) | (0.0-1.1) | (1.0-2.2) | (0.8-2.1) | (0.0-2.6) | (0.0-0.0) |
| Lao People's<br>Democratic<br>Republic* | 0.2       | 0.4        | 0.1       | 0.5       | 0.2       | 0.3       | 0.0       | 1.0       |
|                                         | (0.0-0.5) | (0.0-1.0)  | (0.0-0.3) | (0.3-0.6) | (0.0-0.5) | (0.0-0.6) | (0.0-0.0) | (0.0-3.1) |
| Malaysia*                               | 1.4       | 1.8        | 1.0       | 1.2       | 1.5       | 1.4       | 1.2       | 0.9       |
|                                         | (1.1-1.6) | (1.5-2.2)* | (0.7-1.2) | (0.8-1.6) | (1.2-1.8) | (1.2-1.7) | (0.5-1.9) | (0.3-1.6) |
| Mongolia                                | 0.3       | 0.4        | 0.3       | 0.3       | 0.3       | 0.4       | 0.0       | 0.0       |
|                                         | (0.2-0.5) | (0.1-0.8)  | (0.0-0.5) | (0.1-0.6) | (0.1-0.6) | (0.1-0.6) | (0.0-0.0) | (0.0-0.0) |
| Philippines                             | 0.9       | 1.1        | 0.8       | 0.6       | 1.1       | 0.8       | 1.8       | 1.3       |
|                                         | (0.5-1.3) | (0.6-1.5)  | (0.2-1.3) | (0.2-0.9) | (0.5-1.7) | (0.3-1.2) | (0.2-3.3) | (0.0-3.3) |
| Samoa                                   | 1.3       | 1.2        | 1.5       | 1.9       | 1.2       | 1.4       | 0.7       | 1.4       |
|                                         | (0.7-2.0) | (0.4-2.1)  | (0.3-2.7) | (0.3-3.4) | (0.8-1.6) | (0.7-2.0) | (0.0-2.0) | (0.0-4.5) |
| Solomon Islands                         | 1.7       | 2.0        | 1.5       | 2.4       | 1.1       | 1.6       | 1.1       | 0.0       |
|                                         | (0.0-3.8) | (0.0-4.8)  | (0.0-3.2) | (0.0-5.6) | (0.0-2.2) | (0.0-3.9) | (0.0-3.5) | (0.0-0.0) |
| Tonga                                   | 1.0       | 1.0        | 1.1       | 1.0       | 1.1       | 0.9       | 1.4       | 2.2       |
|                                         | (0.5-1.6) | (0.2-1.8)  | (0.3-1.8) | (0.2-1.8) | (0.4-1.7) | (0.3-1.5) | (0.0-3.3) | (0.0-5.0) |
| Vanuatu                                 | 0.4       | 0.3        | 0.5       | 0.0       | 0.8       | 0.2       | 0.9       | 0.0       |
|                                         | (0.0-0.9) | (0.0-0.7)  | (0.0-1.4) | (0.0-0.0) | (0.0-1.9) | (0.0-0.6) | (0.0-3.4) | (0.0-0.0) |
| Vietnam*                                | 0.3       | 0.5        | 0.1       | -         | 0.3       | 0.3       | 0.0       | 0.0       |
|                                         | (0.0-0.6) | (0.0-1.2)  | (0.0-0.4) |           | (0.0-0.6) | (0.0-0.6) | (0.0-0.0) | (0.0-0.0) |
| Wallis and Futuna                       | 0.3       | 0.6        | 0.0       | 0.7       | 0.0       | 0.4       | 0.0       | 0.0       |

|                          |                  |                   |                  |                  |                  |                   |                  |                  |
|--------------------------|------------------|-------------------|------------------|------------------|------------------|-------------------|------------------|------------------|
|                          | (0.0-0.7)        | (0.0-1.4)         | (0.0-0.0)        | (0.0-1.7)        | (0.0-0.0)        | (0.0-0.9)         | (0.0-0.0)        | (0.0-0.0)        |
| <b>Pooled estimates</b>  | <b>0.6</b>       | <b>0.8</b>        | <b>0.5</b>       | <b>0.6</b>       | <b>0.7</b>       | <b>0.6</b>        | <b>1.1</b>       | <b>1.0</b>       |
|                          | <b>(0.4-0.9)</b> | <b>(0.5-1.2)*</b> | <b>(0.2-0.7)</b> | <b>(0.4-0.9)</b> | <b>(0.4-1.0)</b> | <b>(0.3-0.9)</b>  | <b>(0.6-1.5)</b> | <b>(0.5-1.6)</b> |
| <b>I<sup>2</sup>(%)</b>  | 93.6             | 81.0              | 88.4             | 56.0             | 94.0             | 93.3              | 0                | 0                |
| <b>Total</b>             |                  |                   |                  |                  |                  |                   |                  |                  |
| <b>Pooled estimates*</b> | <b>0.7</b>       | <b>0.9</b>        | <b>0.5</b>       | <b>0.8</b>       | <b>0.8</b>       | <b>0.8</b>        | <b>1.1</b>       | <b>1.0</b>       |
|                          | <b>(0.5-1.0)</b> | <b>(0.6-1.3)*</b> | <b>(0.3-0.7)</b> | <b>(0.4-1.1)</b> | <b>(0.5-1.1)</b> | <b>(0.5-1.14)</b> | <b>(0.8-1.3)</b> | <b>(0.6-1.3)</b> |
| <b>I<sup>2</sup>(%)</b>  | 81.5             | 83.9              | 76.2             | 85.9             | 78.3             | 81.0              | 61.0             | 0                |

\*There was significantly difference

in the prevalence of all four active between different sex, age, and BMI group ( $P < 0.05$ ).
